# Supplementary material
Source: PubMed Central journal article supplement (PMC6478448)
Supplement: NIHMS1524189-supplement-Change_of_Authorship_form.pdf [file NIHMS1524189-supplement-Change_of_Authorship_form.pdf]

# Change of Authorship Form

(Must be completed and signed by ALL authors)

Please check all that apply

New author(s) have been added (in addition to this form, all new authors must complete the copyright transfer agreement and conflict of interest disclosure.

Change in order of authorship.

An author wishes to remove his/her name. An author's name may only be removed his/her own request and a letter signed by the author should accompany this form

Manuscript Number STROKE/2018/021732R2

Manuscript Title Secondary bleeding during acute experimental intracerebral hemorrhage

## Former Authorship

Please list ALL AUTHORS in the same order as the original submission. For more than 12, use an extra sheet.

### Print Name

Name (1) Frieder Schlunk  
 Name (2) Maximilian Böhm  
 Name (3) Gregoire Boulouis  
 Name (4) Tao Qin  
 Name (5) Michal Arbel  
 Name (6) Paul Fischer

### Print Name

Name (7) Brian Bacskai  
 Name (8) Matthew Frosch  
 Name (9) Matthias Endres  
 Name (10) Steven Greenberg  
 Name (11) Cenk Ayata  
 Name (12) \_\_\_\_\_

## New Authorship

All authors must sign below agreeing to the changes in authorship. The authorship order must reflect the authorship order of the manuscript.

|                                   |                                   |                       |
|-----------------------------------|-----------------------------------|-----------------------|
| Name (1) <u>Frieder Schlunk</u>   | Signature <u>F. Schlunk</u>       | Date <u>3/14/2019</u> |
| Name (2) <u>Maximilian Böhm</u>   | Signature <u>M. Böhm</u>          | Date <u>3/13/2019</u> |
| Name (3) <u>Gregoire Boulouis</u> | Signature <u>G. Boulouis</u>      | Date <u>3/11/2019</u> |
| Name (4) <u>Tao Qin</u>           | Signature <u>Tao Qin</u>          | Date <u>3/4/19</u>    |
| Name (5) <u>Michal Arbel</u>      | Signature _____                   | Date _____            |
| Name (6) <u>Isra Tamim</u>        | Signature <u>J. Tamim</u>         | Date <u>03/11/19</u>  |
| Name (7) <u>Paul Fischer</u>      | Signature _____                   | Date <u>3/11/19</u>   |
| Name (8) <u>Brian Bacskai</u>     | Signature <u>Brian Bacskai</u>    | Date <u>3/11/19</u>   |
| Name (9) <u>Matthew Frosch</u>    | Signature <u>Matthew Frosch</u>   | Date <u>3/11/2019</u> |
| Name (10) <u>Matthias Endres</u>  | Signature <u>M. Endres</u>        | Date <u>3/13/19</u>   |
| Name (11) <u>Steven Greenberg</u> | Signature <u>Steven Greenberg</u> | Date <u>3/11/2019</u> |
| Name (12) <u>Cenk Ayata</u>       | Signature <u>Cenk Ayata</u>       | Date <u>3/11/2019</u> |

Please scan and email to [stroke@strokeahajournal.org](mailto:stroke@strokeahajournal.org).
