# Supplementary material
Source: PubMed Central journal article supplement (PMC6478448)
Supplement: NIHMS1524189-supplement-Confirmation_of_designee_for_Dr__Arbel.pdf [file NIHMS1524189-supplement-Confirmation_of_designee_for_Dr__Arbel.pdf]

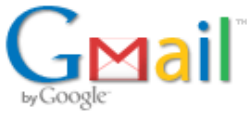

Stroke Journal &lt;stroke@strokeahajournal.org&gt;

**STROKE/2018/021732R1 (Secondary bleeding during acute experimental intracerebral h...)**

29 messages

**fschlunk@gmail.com** <fschlunk@gmail.com>  
 Reply-To: fschlunk@gmail.com  
 To: stroke@strokeahajournal.org

Tue, Dec 11, 2018 at 9:33 AM

Dear Editor,

A few days ago I sent an email with questions regarding our resubmission. Maybe you replied and I didn't receive the email? If yes maybe you can resend the email and cc [Frieder.Schlunk@charite.de](mailto:Frieder.Schlunk@charite.de)?

Thank you very much! Frieder Schlunk

**Stroke Editorial Office** <stroke@strokeahajournal.org>  
 To: fschlunk@gmail.com, Frieder.Schlunk@charite.de

Tue, Dec 11, 2018 at 10:40 AM

Dear Dr. Schlunk,  
 Where your questions regarding the deceased author? Here is what I sent on 12/4:

We will allow you to submit the revision, however please be aware that the issue is just being delayed. You will need to provide some proof from a legal representative or next of kin of the deceased author that they approve of the manuscript and will sign the publication forms. You may be able to check with MGH's Human Resources (via your Research Administrator) as they would likely have a point of contact. You might ask HR to send a letter to the family on your behalf.

As a last resort, perhaps there is something in writing from the institution that may be able to be used in place of a legal representative? The Scientific Publication Committee would need to approve this document. Do you have copies of emails sent or some other document attesting to the steps taken that include Dr. Arbel? AHA might want proof of a good faith effort to contact Dr. Arbel's family. Don't send anything yet; you should discuss the matter with your research administrator first to see if he or she could provide some documentation.

Please note, Dr. Frosch has not completed the copyright form. Once he completes it, please inform us and we can override the 2 forms for Michal Arbel to allow you to submit the revision.

Thank you,  
 Pamela Lepkowski  
**Stroke** Editorial Office  
[stroke@strokeahajournal.org](mailto:stroke@strokeahajournal.org)

**The International Stroke Conference - Connecting the World to Stroke Science!**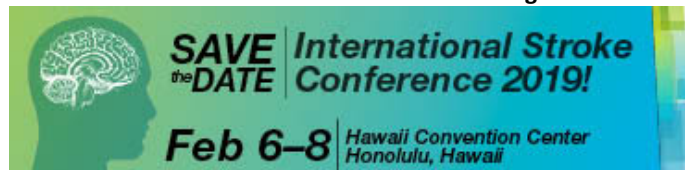**Housing & Registration Opens:**

FAHA/VIP: Sept 26, 2018

Nonmembers: Oct 10, 2018

Members: Oct 3, 2018

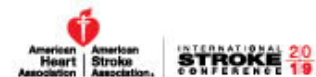

**International Stroke Conference:** Feb 6 - 8, 2019, Honolulu, HI *Education. Inspiration. Illumination.*  
**State-of-the-Science Stroke Nursing Symposium** and **ISC Pre-Conference Symposia:** Feb 5, 2019, Honolulu, HI

On Tue, Dec 11, 2018 at 9:33 AM &lt;fschlunk@gmail.com&gt; wrote:

Dear Editor,

A few days ago I sent an email with questions regarding our resubmission. Maybe you replied and I didn't receive the email? If yes maybe you can resend the email and cc [Frieder.Schlunk@charite.de](mailto:Frieder.Schlunk@charite.de)?

Thank you very much! Frieder Schlunk

**Schlunk, Frieder** <frieder.schlunk@charite.de>  
To: Stroke Editorial Office <stroke@strokeahajournal.org>

Tue, Dec 11, 2018 at 10:55 AM

Dear Pamela Lepkowski,

thank you for your email. It seems that I did not receive your last email. I will discuss this in our team and let you know as soon as possible.

Thanks, Frieder Schlunk

**Von:** Stroke Editorial Office [[stroke@strokeahajournal.org](mailto:stroke@strokeahajournal.org)]

**Gesendet:** Dienstag, 11. Dezember 2018 16:40

**An:** [fschlunk@gmail.com](mailto:fschlunk@gmail.com); Schlunk, Frieder

**Betreff:** [ext] Re: STROKE/2018/021732R1 (Secondary bleeding during acute experimental intracerebral h...)

Dear Dr. Schlunk,

Where your questions regarding the deceased author? Here is what I sent on 12/4:

We will allow you to submit the revision, however please be aware that the issue is just being delayed. You will need to provide some proof from a legal representative or next of kin of the deceased author that they approve of the manuscript and will sign the publication forms. You may be able to check with MGH's Human Resources (via your Research Administrator) as they would likely have a point of contact. You might ask HR to send a letter to the family on your behalf.

As a last resort, perhaps there is something in writing from the institution that may be able to be used in place of a legal representative? The Scientific Publication Committee would need to approve this document. Do you have copies of emails sent or some other document attesting to the steps taken that include Dr. Arbel? AHA might want proof of a good faith effort to contact Dr. Arbel's family. Don't send anything yet; you should discuss the matter with your research administrator first to see if he or she could provide some documentation.

Please note, Dr. Frosch has not completed the copyright form. Once he completes it, please inform us and we can override the 2 forms for Michal Arbel to allow you to submit the revision.

Thank you,  
Pamela Lepkowski  
**Stroke** Editorial Office  
[stroke@strokeahajournal.org](mailto:stroke@strokeahajournal.org)

The International Stroke Conference - Connecting the World to Stroke Science!

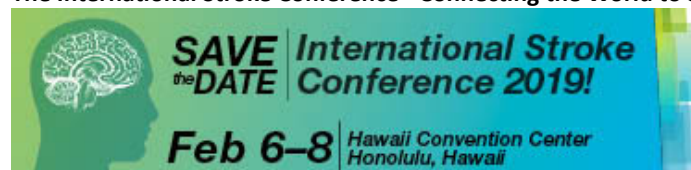

**Housing & Registration Opens:**

**FAHA/VIP:** Sept 26, 2018

**Members:** Oct 3, 2018

**Nonmembers:** Oct 10, 2018

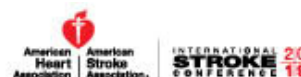

INTERNATIONAL STROKE CONFERENCE 2019

International Stroke Conference: Feb 6 - 8, 2019, Honolulu, HI *Education. Inspiration. Illumination.*  
State-of-the-Science Stroke Nursing Symposium and ISC Pre-Conference Symposia: Feb 5, 2019, Honolulu, HI

On Tue, Dec 11, 2018 at 9:33 AM <[fschlunk@gmail.com](mailto:fschlunk@gmail.com)> wrote:

Dear Editor,

A few days ago I sent an email with questions regarding our resubmission. Maybe you replied and I didn't receive the email? If yes maybe you can resend the email and cc [Frieder.Schlunk@charite.de](mailto:Frieder.Schlunk@charite.de)?

Thank you very much! Frieder Schlunk

---

**Schlunk, Frieder** <[frieder.schlunk@charite.de](mailto:frieder.schlunk@charite.de)>  
To: Stroke Editorial Office <[stroke@strokeahajournal.org](mailto:stroke@strokeahajournal.org)>

Wed, Dec 12, 2018 at 9:02 AM

Dear Pamela Lepkowski,

we were finally able to reach Matthew Frosch and his electronic form is now completed. Very sorry for the delay! The files are all uploaded but I can still not proceed with the submission since Michal Arbels electronic forms are not provided yet. Can you help?

Thanks, Frieder

---

**Von:** Stroke Editorial Office [[stroke@strokeahajournal.org](mailto:stroke@strokeahajournal.org)]

**Gesendet:** Dienstag, 11. Dezember 2018 16:40

**An:** [fschlunk@gmail.com](mailto:fschlunk@gmail.com); Schlunk, Frieder

**Betreff:** [ext] Re: STROKE/2018/021732R1 (Secondary bleeding during acute experimental intracerebral h...)

Dear Dr. Schlunk,  
Where your questions regarding the deceased author? Here is what I sent on 12/4:

We will allow you to submit the revision, however please be aware that the issue is just being delayed. You will need to provide some proof from a legal representative or next of kin of the deceased author that they approve of the manuscript and will sign the publication forms. You may be able to check with MGH's Human Resources (via your Research Administrator) as they would likely have a point of contact. You might ask HR to send a letter to the family on your behalf.

As a last resort, perhaps there is something in writing from the institution that may be able to be used in place of a legal representative? The Scientific Publication Committee would need to approve this document. Do you have copies of emails sent or some other document attesting to the steps taken that include Dr. Arbel? AHA might want proof of a good faith effort to contact Dr. Arbel's family. Don't send anything yet; you should discuss the matter with your research administrator first to see if he or she could provide some documentation.

Please note, Dr. Frosch has not completed the copyright form. Once he completes it, please inform us and we can override the 2 forms for Michal Arbel to allow you to submit the revision.

Thank you,  
Pamela Lepkowski  
**Stroke** Editorial Office  
[stroke@strokeahajournal.org](mailto:stroke@strokeahajournal.org)

**The International Stroke Conference - Connecting the World to Stroke Science!**

**International Stroke Conference:** Feb 6 - 8, 2019, Honolulu, HI *Education. Inspiration. Illumination.*  
**State-of-the-Science Stroke Nursing Symposium** and **ISC Pre-Conference Symposia:** Feb 5, 2019, Honolulu, HI

On Tue, Dec 11, 2018 at 9:33 AM <[fschlunk@gmail.com](mailto:fschlunk@gmail.com)> wrote:

Dear Editor,

A few days ago I sent an email with questions regarding our resubmission. Maybe you replied and I didn't receive the email? If yes maybe you can resend the email and cc [Frieder.Schlunk@charite.de](mailto:Frieder.Schlunk@charite.de)?

Thank you very much! Frieder Schlunk

**Stroke Editorial Office** <stroke@strokeahajournal.org>  
To: Rebecca Seastrong <rseastrong@strokeahajournal.org>

Wed, Dec 12, 2018 at 10:25 AM

Ok Rebecca, Looks like all the forms have been submitted EXCEPT the deceased author. Do I just mark the 2 forms complete on our end? I have a HUGE RED sticky regarding the forms. Once I mark them complete, the author should then be able to submit, correct?

thanks,  
pamela

**Stroke Editorial Office**  
stroke@strokeahajournal.org

**The International Stroke Conference - Connecting the World to Stroke Science!**

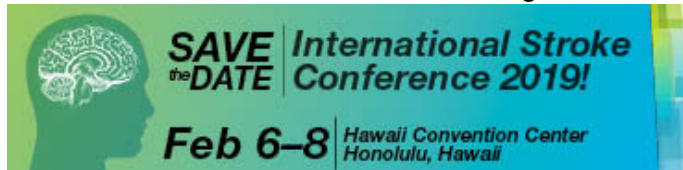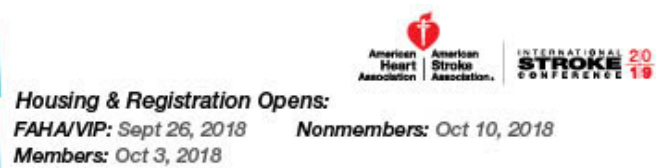

[International Stroke Conference](#): Feb 6 - 8, 2019, Honolulu, HI *Education. Inspiration. Illumination.*  
[State-of-the-Science Stroke Nursing Symposium](#) and [ISC Pre-Conference Symposia](#): Feb 5, 2019, Honolulu, HI

----- Forwarded message -----

From: **Schlunk, Frieder** <frieder.schlunk@charite.de>  
Date: Wed, Dec 12, 2018 at 9:02 AM  
Subject: AW: [ext] Re: STROKE/2018/021732R1 (Secondary bleeding during acute experimental intracerebral h...)  
To: Stroke Editorial Office <stroke@strokeahajournal.org>

Dear Pamela Lepkowski,

we were finally able to reach Matthew Frosch and his electronic form is now completed. Very sorry for the delay! The files are all uploaded but I can still not proceed with the submission since Michal Arbels electronic forms are not provided yet. Can you help?

Thanks, Frieder

**Von:** Stroke Editorial Office [[stroke@strokeahajournal.org](mailto:stroke@strokeahajournal.org)]  
**Gesendet:** Dienstag, 11. Dezember 2018 16:40  
**An:** [fschlunk@gmail.com](mailto:fschlunk@gmail.com); Schlunk, Frieder  
**Betreff:** [ext] Re: STROKE/2018/021732R1 (Secondary bleeding during acute experimental intracerebral h...)

Dear Dr. Schlunk,  
Where your questions regarding the deceased author? Here is what I sent on 12/4:

We will allow you to submit the revision, however please be aware that the issue is just being delayed. You will need to provide some proof from a legal representative or next of kin of the deceased author that they approve of the manuscript and will sign the publication forms. You may be able to check with MGH's Human Resources (via your Research Administrator) as they would likely have a point of contact. You might ask HR to send a letter to the family on your behalf.

As a last resort, perhaps there is something in writing from the institution that may be able to be used in place of a legal representative? The Scientific Publication Committee would need to approve this document. Do you have copies of emails sent or some other document attesting to the steps taken that include Dr. Arbel? AHA might want proof of a good faith effort to

contact Dr. Arbel's family. Don't send anything yet; you should discuss the matter with your research administrator first to see if he or she could provide some documentation.

Please note, Dr. Frosch has not completed the copyright form. Once he completes it, please inform us and we can override the 2 forms for Michal Arbel to allow you to submit the revision.

Thank you,  
 Pamela Lepkowski  
**Stroke** Editorial Office  
[stroke@strokeahajournal.org](mailto:stroke@strokeahajournal.org)

### The International Stroke Conference - Connecting the World to Stroke Science!

**International Stroke Conference:** Feb 6 - 8, 2019, Honolulu, HI *Education. Inspiration. Illumination.*  
**State-of-the-Science Stroke Nursing Symposium** and **ISC Pre-Conference Symposia:** Feb 5, 2019, Honolulu, HI

On Tue, Dec 11, 2018 at 9:33 AM <[fschlunk@gmail.com](mailto:fschlunk@gmail.com)> wrote:

Dear Editor,

A few days ago I sent an email with questions regarding our resubmission. Maybe you replied and I didn't receive the email? If yes maybe you can resend the email and cc [Frieder.Schlunk@charite.de](mailto:Frieder.Schlunk@charite.de)?

Thank you very much! Frieder Schlunk

**Rebecca Seastrong** <[rseastrong@strokeahajournal.org](mailto:rseastrong@strokeahajournal.org)>  
 To: Stroke Editorial Office <[stroke@strokeahajournal.org](mailto:stroke@strokeahajournal.org)>

Wed, Dec 12, 2018 at 10:42 AM

Hi

Yes, that is the way to go.

However, ask him to double check the files. The ms file that is converted to PDF seems to be from 07/23/2018 (first version) and I don't see a visual abstract.

He can make the tracked changes version the Manuscript File (so that it will convert to PDF) if that is easier, but we don't want the original ms shown in the r1 version.

Cheers,

Rebecca

On Wed, Dec 12, 2018 at 10:25 AM Stroke Editorial Office <[stroke@strokeahajournal.org](mailto:stroke@strokeahajournal.org)> wrote:

Ok Rebecca, Looks like all the forms have been submitted EXCEPT the deceased author. Do I just mark the 2 forms complete on our end? I have a HUGE RED sticky regarding the forms. Once I mark them complete, the author should then be able to submit, correct?

thanks,  
 pamela

**Stroke** Editorial Office  
[stroke@strokeahajournal.org](mailto:stroke@strokeahajournal.org)

### The International Stroke Conference - Connecting the World to Stroke Science!

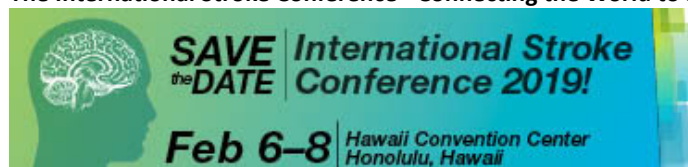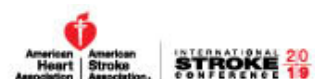

**Housing & Registration Opens:**

**FAHA/VIP:** Sept 26, 2018

**Nonmembers:** Oct 10, 2018

**Members:** Oct 3, 2018

**International Stroke Conference:** Feb 6 - 8, 2019, Honolulu, HI *Education. Inspiration. Illumination.*  
**State-of-the-Science Stroke Nursing Symposium** and **ISC Pre-Conference Symposia:** Feb 5, 2019, Honolulu, HI

----- Forwarded message -----

From: **Schlunk, Frieder** <frieder.schlunk@charite.de>

Date: Wed, Dec 12, 2018 at 9:02 AM

Subject: AW: [ext] Re: STROKE/2018/021732R1 (Secondary bleeding during acute experimental intracerebral h...)

To: Stroke Editorial Office <stroke@strokeahajournal.org>

Dear Pamela Lepkowski,

we were finally able to reach Matthew Frosch and his electronic form is now completed. Very sorry for the delay! The files are all uploaded but I can still not proceed with the submission since Michal Arbels electronic forms are not provided yet. Can you help?

Thanks, Frieder

---

**Von:** Stroke Editorial Office [[stroke@strokeahajournal.org](mailto:stroke@strokeahajournal.org)]

**Gesendet:** Dienstag, 11. Dezember 2018 16:40

**An:** [fschlunk@gmail.com](mailto:fschlunk@gmail.com); Schlunk, Frieder

**Betreff:** [ext] Re: STROKE/2018/021732R1 (Secondary bleeding during acute experimental intracerebral h...)

Dear Dr. Schlunk,

Where your questions regarding the deceased author? Here is what I sent on 12/4:

We will allow you to submit the revision, however please be aware that the issue is just being delayed. You will need to provide some proof from a legal representative or next of kin of the deceased author that they approve of the manuscript and will sign the publication forms. You may be able to check with MGH's Human Resources (via your Research Administrator) as they would likely have a point of contact. You might ask HR to send a letter to the family on your behalf.

As a last resort, perhaps there is something in writing from the institution that may be able to be used in place of a legal representative? The Scientific Publication Committee would need to approve this document. Do you have copies of emails sent or some other document attesting to the steps taken that include Dr. Arbel? AHA might want proof of a good faith effort to contact Dr. Arbel's family. Don't send anything yet; you should discuss the matter with your research administrator first to see if he or she could provide some documentation.

Please note, Dr. Frosch has not completed the copyright form. Once he completes it, please inform us and we can override the 2 forms for Michal Arbel to allow you to submit the revision.

Thank you,  
Pamela Lepkowski  
**Stroke** Editorial Office  
[stroke@strokeahajournal.org](mailto:stroke@strokeahajournal.org)

**The International Stroke Conference - Connecting the World to Stroke Science!**

**International Stroke Conference:** Feb 6 - 8, 2019, Honolulu, HI *Education. Inspiration. Illumination.*

**State-of-the-Science Stroke Nursing Symposium and ISC Pre-Conference Symposia:** Feb 5, 2019, Honolulu, HI

On Tue, Dec 11, 2018 at 9:33 AM <[fschlunk@gmail.com](mailto:fschlunk@gmail.com)> wrote:

Dear Editor,



A few days ago I sent an email with questions regarding our resubmission. Maybe you replied and I didn't receive the email? If yes maybe you can resend the email and cc [Frieder.Schlunk@charite.de](mailto:Frieder.Schlunk@charite.de)?

Thank you very much! Frieder Schlunk

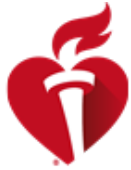

**Rebecca Seastrong**  
 Managing Editor, Stroke  
**American Heart Association**  
 200 5th Avenue | Waltham | MA | 02451  
 O 781.902.4395

**Stroke Editorial Office** <stroke@strokeahajournal.org>  
 To: "Schlunk, Frieder" <frieder.schlunk@charite.de>, "Ayata, Cenk, M.D." <cayata@partners.org>

Wed, Dec 12, 2018 at 11:36 AM

Dear Dr. Schlunk,  
 Thank you for letting us know. I have marked the forms complete for Dr. Dr. Arbel (for now).

Please double check the files. The manuscript file that is converted to PDF seems to be from 07/23/2018 (first version) and I don't see a visual abstract uploaded. Those 2 items I could quickly identify. I did not go thru your whole submission.

You may make the tracked changes version the Manuscript File (so that it will convert to PDF) if that is easier, but we don't want the original ms shown in the r1 version.

Please let me know if you have any further questions.  
 Thank you,  
 Pamela Lepkowski

**Stroke** Editorial Office  
[stroke@strokeahajournal.org](mailto:stroke@strokeahajournal.org)

#### The International Stroke Conference - Connecting the World to Stroke Science!

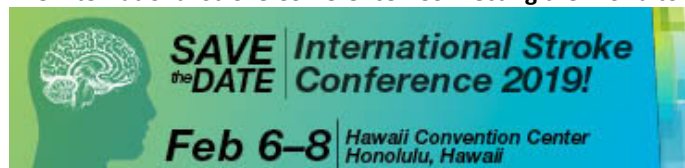

#### Housing & Registration Opens:

**FAHA/VIP: Sept 26, 2018**

**Nonmembers: Oct 10, 2018**

**Members: Oct 3, 2018**

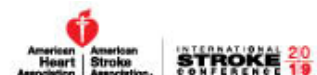

**International Stroke Conference:** Feb 6 - 8, 2019, Honolulu, HI *Education. Inspiration. Illumination.*  
**State-of-the-Science Stroke Nursing Symposium and ISC Pre-Conference Symposia:** Feb 5, 2019, Honolulu, HI

On Wed, Dec 12, 2018 at 9:02 AM Schlunk, Frieder <frieder.schlunk@charite.de> wrote:

Dear Pamela Lepkowski,

we were finally able to reach Matthew Frosch and his electronic form is now completed. Very sorry for the delay! The files are all uploaded but I can still not proceed with the submission since Michal Arbels electronic forms are not provided yet. Can you help?

Thanks, Frieder

**Von:** Stroke Editorial Office [[stroke@strokeahajournal.org](mailto:stroke@strokeahajournal.org)]  
**Gesendet:** Dienstag, 11. Dezember 2018 16:40

**An:** [fschlunk@gmail.com](mailto:fschlunk@gmail.com); Schlunk, Frieder

**Betreff:** [ext] Re: STROKE/2018/021732R1 (Secondary bleeding during acute experimental intracerebral h...)

Dear Dr. Schlunk,  
Where your questions regarding the deceased author? Here is what I sent on 12/4:

We will allow you to submit the revision, however please be aware that the issue is just being delayed. You will need to provide some proof from a legal representative or next of kin of the deceased author that they approve of the manuscript and will sign the publication forms. You may be able to check with MGH's Human Resources (via your Research Administrator) as they would likely have a point of contact. You might ask HR to send a letter to the family on your behalf.

As a last resort, perhaps there is something in writing from the institution that may be able to be used in place of a legal representative? The Scientific Publication Committee would need to approve this document. Do you have copies of emails sent or some other document attesting to the steps taken that include Dr. Arbel? AHA might want proof of a good faith effort to contact Dr. Arbel's family. Don't send anything yet; you should discuss the matter with your research administrator first to see if he or she could provide some documentation.

Please note, Dr. Frosch has not completed the copyright form. Once he completes it, please inform us and we can override the 2 forms for Michal Arbel to allow you to submit the revision.

Thank you,  
Pamela Lepkowski  
**Stroke** Editorial Office  
[stroke@strokeahajournal.org](mailto:stroke@strokeahajournal.org)

#### The International Stroke Conference - Connecting the World to Stroke Science!

[International Stroke Conference](#): Feb 6 - 8, 2019, Honolulu, HI *Education. Inspiration. Illumination.*  
[State-of-the-Science Stroke Nursing Symposium and ISC Pre-Conference Symposia](#): Feb 5, 2019, Honolulu, HI

On Tue, Dec 11, 2018 at 9:33 AM <[fschlunk@gmail.com](mailto:fschlunk@gmail.com)> wrote:

Dear Editor,

A few days ago I sent an email with questions regarding our resubmission. Maybe you replied and I didn't receive the email? If yes maybe you can resend the email and cc [Frieder.Schlunk@charite.de](mailto:Frieder.Schlunk@charite.de)?

Thank you very much! Frieder Schlunk

**Stroke Editorial Office** <[stroke@strokeahajournal.org](mailto:stroke@strokeahajournal.org)>  
To: Rebecca Seastrong <[rseastrong@strokeahajournal.org](mailto:rseastrong@strokeahajournal.org)>

Wed, Dec 12, 2018 at 11:37 AM

Thank you Rebecca! I didn't notice the dates on the files or the missing visual abstract so I appreciate (as do I'm sure the authors) you pointing this out to me now!

best,  
pamela  
**Stroke** Editorial Office  
[stroke@strokeahajournal.org](mailto:stroke@strokeahajournal.org)

#### The International Stroke Conference - Connecting the World to Stroke Science!

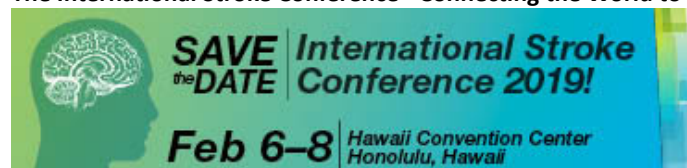

**Housing & Registration Opens:**  
FAHA/VIP: Sept 26, 2018 Nonmembers: Oct 10, 2018  
Members: Oct 3, 2018

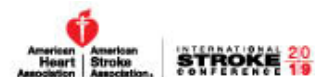

[International Stroke Conference](#): Feb 6 - 8, 2019, Honolulu, HI *Education. Inspiration. Illumination.*  
[State-of-the-Science Stroke Nursing Symposium and ISC Pre-Conference Symposia](#): Feb 5, 2019, Honolulu, HI



On Wed, Dec 12, 2018 at 10:42 AM Rebecca Seastrong <rseastrong@strokeahajournal.org> wrote:

Hi

Yes, that is the way to go.

However, ask him to double check the files. The ms file that is converted to PDF seems to be from 07/23/2018 (first version) and I don't see a visual abstract.

He can make the tracked changes version the Manuscript File (so that it will convert to PDF) if that is easier, but we don't want the original ms shown in the r1 version.

Cheers,

Rebecca

On Wed, Dec 12, 2018 at 10:25 AM Stroke Editorial Office <stroke@strokeahajournal.org> wrote:

Ok Rebecca, Looks like all the forms have been submitted EXCEPT the deceased author. Do I just mark the 2 forms complete on our end? I have a HUGE RED sticky regarding the forms. Once I mark them complete, the author should then be able to submit, correct?

thanks,  
pamela

**Stroke** Editorial Office  
stroke@strokeahajournal.org

#### The International Stroke Conference - Connecting the World to Stroke Science!



**SAVE the DATE International Stroke Conference 2019!**  
**Feb 6-8** | Hawaii Convention Center Honolulu, Hawaii

**Housing & Registration Opens:**  
FAHA/VIP: Sept 26, 2018      Nonmembers: Oct 10, 2018  
Members: Oct 3, 2018

American Heart Association | American Stroke Association | INTERNATIONAL STROKE CONFERENCE 2019

International Stroke Conference: Feb 6 - 8, 2019, Honolulu, HI      *Education. Inspiration. Illumination.*

State-of-the-Science Stroke Nursing Symposium and ISC Pre-Conference Symposia: Feb 5, 2019, Honolulu, HI

----- Forwarded message -----

From: **Schlunk, Frieder** <frieder.schlunk@charite.de>

Date: Wed, Dec 12, 2018 at 9:02 AM

Subject: AW: [ext] Re: STROKE/2018/021732R1 (Secondary bleeding during acute experimental intracerebral h...)

To: Stroke Editorial Office <stroke@strokeahajournal.org>

Dear Pamela Lepkowski,

we were finally able to reach Matthew Frosch and his electronic form is now completed. Very sorry for the delay! The files are all uploaded but I can still not proceed with the submission since Michal Arbels electronic forms are not provided yet. Can you help?

Thanks, Frieder

---

**Von:** Stroke Editorial Office [stroke@strokeahajournal.org]

**Gesendet:** Dienstag, 11. Dezember 2018 16:40

**An:** fschlunk@gmail.com; Schlunk, Frieder

**Betreff:** [ext] Re: STROKE/2018/021732R1 (Secondary bleeding during acute experimental intracerebral h...)

Dear Dr. Schlunk,  
Where your questions regarding the deceased author? Here is what I sent on 12/4:

We will allow you to submit the revision, however please be aware that the issue is just being delayed. You will need to provide some proof from a legal representative or next of kin of the deceased author that they approve of the manuscript and will sign the publication forms. You may be able to check with MGH's Human Resources (via your Research Administrator) as they would likely have a point of contact. You might ask HR to send a letter to the family on your behalf.

As a last resort, perhaps there is something in writing from the institution that may be able to be used in place of a legal representative? The Scientific Publication Committee would need to approve this document. Do you have copies of emails sent or some other document attesting to the steps taken that include Dr. Arbel? AHA might want proof of a good faith effort to contact Dr. Arbel's family. Don't send anything yet; you should discuss the matter with your research administrator first to see if he or she could provide some documentation.

Please note, Dr. Frosch has not completed the copyright form. Once he completes it, please inform us and we can override the 2 forms for Michal Arbel to allow you to submit the revision.

Thank you,  
Pamela Lepkowski  
**Stroke** Editorial Office  
[stroke@strokeahajournal.org](mailto:stroke@strokeahajournal.org)

#### The International Stroke Conference - Connecting the World to Stroke Science!

[International Stroke Conference](#): Feb 6 - 8, 2019, Honolulu, HI *Education. Inspiration. Illumination.*  
[State-of-the-Science Stroke Nursing Symposium](#) and [ISC Pre-Conference Symposia](#): Feb 5, 2019, Honolulu, HI

On Tue, Dec 11, 2018 at 9:33 AM <[fschlunk@gmail.com](mailto:fschlunk@gmail.com)> wrote:

Dear Editor,

A few days ago I sent an email with questions regarding our resubmission. Maybe you replied and I didn't receive the email? If yes maybe you can resend the email and cc [Frieder.Schlunk@charite.de](mailto:Frieder.Schlunk@charite.de)?

Thank you very much! Frieder Schlunk

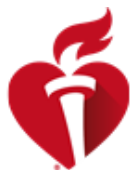

**Rebecca Seastrong**  
Managing Editor, Stroke  
**American Heart Association**  
200 5th Avenue | Waltham | MA | 02451  
O 781.902.4395

**Rebecca Seastrong** <[rseastrong@strokeahajournal.org](mailto:rseastrong@strokeahajournal.org)>  
To: Stroke Editorial Office <[stroke@strokeahajournal.org](mailto:stroke@strokeahajournal.org)>

Wed, Dec 12, 2018 at 12:06 PM

Hi,

It is no problem. We will train you on revisions soon enough. Same process, more to look for.

-Rebecca

On Wed, Dec 12, 2018 at 11:37 AM Stroke Editorial Office <[stroke@strokeahajournal.org](mailto:stroke@strokeahajournal.org)> wrote:

Thank you Rebecca! I didn't notice the dates on the files or the missing visual abstract so I appreciate (as do I'm sure the authors) you pointing this out to me now!

best,  
pamela

**Stroke** Editorial Office  
[stroke@strokeahajournal.org](mailto:stroke@strokeahajournal.org)

**The International Stroke Conference - Connecting the World to Stroke Science!**



**SAVE the DATE International Stroke Conference 2019!**  
**Feb 6-8** Hawaii Convention Center  
 Honolulu, Hawaii

**Housing & Registration Opens:**  
**FAHA/VIP:** Sept 26, 2018    **Nonmembers:** Oct 10, 2018  
**Members:** Oct 3, 2018

American Heart Association | American Stroke Association | INTERNATIONAL STROKE CONFERENCE 2019

[International Stroke Conference](#): Feb 6 - 8, 2019, Honolulu, HI    *Education. Inspiration. Illumination.*  
[State-of-the-Science Stroke Nursing Symposium](#) and [ISC Pre-Conference Symposia](#): Feb 5, 2019, Honolulu, HI

On Wed, Dec 12, 2018 at 10:42 AM Rebecca Seastrong <[rseastrong@strokeahajournal.org](mailto:rseastrong@strokeahajournal.org)> wrote:

Hi

Yes, that is the way to go.

However, ask him to double check the files. The ms file that is converted to PDF seems to be from 07/23/2018 (first version) and I don't see a visual abstract.

He can make the tracked changes version the Manuscript File (so that it will convert to PDF) if that is easier, but we don't want the original ms shown in the r1 version.

Cheers,

Rebecca

On Wed, Dec 12, 2018 at 10:25 AM Stroke Editorial Office <[stroke@strokeahajournal.org](mailto:stroke@strokeahajournal.org)> wrote:

Ok Rebecca, Looks like all the forms have been submitted EXCEPT the deceased author. Do I just mark the 2 forms complete on our end? I have a HUGE RED sticky regarding the forms. Once I mark them complete, the author should then be able to submit, correct?

thanks,  
 pamela

**Stroke** Editorial Office  
[stroke@strokeahajournal.org](mailto:stroke@strokeahajournal.org)

**The International Stroke Conference - Connecting the World to Stroke Science!**



**SAVE the DATE International Stroke Conference 2019!**  
**Feb 6-8** Hawaii Convention Center  
 Honolulu, Hawaii

**Housing & Registration Opens:**  
**FAHA/VIP:** Sept 26, 2018    **Nonmembers:** Oct 10, 2018  
**Members:** Oct 3, 2018

American Heart Association | American Stroke Association | INTERNATIONAL STROKE CONFERENCE 2019

[International Stroke Conference](#): Feb 6 - 8, 2019, Honolulu, HI    *Education. Inspiration. Illumination.*  
[State-of-the-Science Stroke Nursing Symposium](#) and [ISC Pre-Conference Symposia](#): Feb 5, 2019, Honolulu, HI

----- Forwarded message -----

From: **Schlunk, Frieder** <[frieder.schlunk@charite.de](mailto:frieder.schlunk@charite.de)>

Date: Wed, Dec 12, 2018 at 9:02 AM

Subject: AW: [ext] Re: STROKE/2018/021732R1 (Secondary bleeding during acute experimental intracerebral h...)

To: Stroke Editorial Office <[stroke@strokeahajournal.org](mailto:stroke@strokeahajournal.org)>

Dear Pamela Lepkowski,

we were finally able to reach Matthew Frosch and his electronic form is now completed. Very sorry for the delay! The files are all uploaded but I can still not proceed with the submission since Michal Arbels electronic forms are not provided yet. Can you help?

Thanks, Frieder

---

**Von:** Stroke Editorial Office [[stroke@strokeahajournal.org](mailto:stroke@strokeahajournal.org)]

**Gesendet:** Dienstag, 11. Dezember 2018 16:40

**An:** [fschlunk@gmail.com](mailto:fschlunk@gmail.com); Schlunk, Frieder

**Betreff:** [ext] Re: STROKE/2018/021732R1 (Secondary bleeding during acute experimental intracerebral h...)

Dear Dr. Schlunk,  
Where your questions regarding the deceased author? Here is what I sent on 12/4:

We will allow you to submit the revision, however please be aware that the issue is just being delayed. You will need to provide some proof from a legal representative or next of kin of the deceased author that they approve of the manuscript and will sign the publication forms. You may be able to check with MGH's Human Resources (via your Research Administrator) as they would likely have a point of contact. You might ask HR to send a letter to the family on your behalf.

As a last resort, perhaps there is something in writing from the institution that may be able to be used in place of a legal representative? The Scientific Publication Committee would need to approve this document. Do you have copies of emails sent or some other document attesting to the steps taken that include Dr. Arbel? AHA might want proof of a good faith effort to contact Dr. Arbel's family. Don't send anything yet; you should discuss the matter with your research administrator first to see if he or she could provide some documentation.

Please note, Dr. Frosch has not completed the copyright form. Once he completes it, please inform us and we can override the 2 forms for Michal Arbel to allow you to submit the revision.

Thank you,  
Pamela Lepkowski  
Stroke Editorial Office  
[stroke@strokeahajournal.org](mailto:stroke@strokeahajournal.org)

#### The International Stroke Conference - Connecting the World to Stroke Science!

[International Stroke Conference](#): Feb 6 - 8, 2019, Honolulu, HI *Education. Inspiration. Illumination.*

[State-of-the-Science Stroke Nursing Symposium](#) and [ISC Pre-Conference Symposia](#): Feb 5, 2019, Honolulu, HI

On Tue, Dec 11, 2018 at 9:33 AM <[fschlunk@gmail.com](mailto:fschlunk@gmail.com)> wrote:

Dear Editor,

A few days ago I sent an email with questions regarding our resubmission. Maybe you replied and I didn't receive the email? If yes maybe you can resend the email and cc [Frieder.Schlunk@charite.de](mailto:Frieder.Schlunk@charite.de)?

Thank you very much! Frieder Schlunk

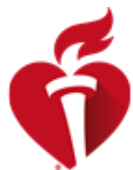

**Rebecca Seastrong**

Managing Editor, Stroke

American Heart Association

200 5th Avenue | Waltham | MA | 02451

O 781.902.4395

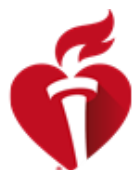

**Rebecca Seastrong**  
 Managing Editor, Stroke  
**American Heart Association**  
 200 5th Avenue | Waltham | MA | 02451  
 O 781.902.4395

**Schlunk, Frieder** <frieder.schlunk@charite.de>  
 To: Stroke Editorial Office <stroke@strokeahajournal.org>

Wed, Dec 12, 2018 at 1:21 PM

Dear Pamela Lepkowski,

please see my questions below in your email

Dear Dr. Schlunk,

Thank you for letting us know. I have marked the forms complete for Dr. Dr. Arbel (for now).

*Thank you very much! That is a great help!*

Please double check the files. The manuscript file that is converted to PDF seems to be from 07/23/2018 (first version) and I don't see a visual abstract uploaded. Those 2 items I could quickly identify. I did not go thru your whole submission.

*I uploaded the manuscript with our modifications highlighted. For some reason the old version of the manuscript was uploaded too. I am not sure why and will try to remove it.*

*Is it necessary to upload the visual abstract already now? I understood that it can be uploaded at a later time point. Would that be possible?*

You may make the tracked changes version the Manuscript File (so that it will convert to PDF) if that is easier, but we don't want the original ms shown in the r1 version.

*See further above. Thanks again!!*

Please let me know if you have any further questions.

Thank you,

Pamela Lepkowski

**Stroke** Editorial Office

[stroke@strokeahajournal.org](mailto:stroke@strokeahajournal.org)

**The International Stroke Conference - Connecting the World to Stroke Science!**

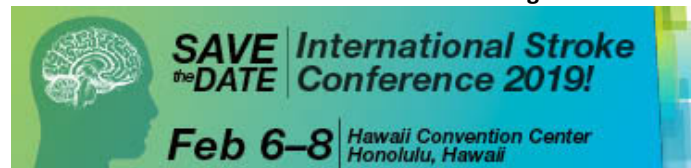

**Housing & Registration Opens:**

**FAHA/VIP: Sept 26, 2018**

**Members: Oct 3, 2018**

**Nonmembers: Oct 10, 2018**

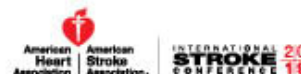

[International Stroke Conference: Feb 6 - 8, 2019, Honolulu, HI](#) *Education. Inspiration. Illumination.*

[State-of-the-Science Stroke Nursing Symposium and ISC Pre-Conference Symposia: Feb 5, 2019, Honolulu, HI](#)

On Wed, Dec 12, 2018 at 9:02 AM Schlunk, Frieder <frieder.schlunk@charite.de> wrote:

Dear Pamela Lepkowski,

we were finally able to reach Matthew Frosch and his electronic form is now completed. Very sorry for the delay! The files are all uploaded but I can still not proceed with the submission since Michal Arbels electronic forms are not provided yet. Can you help?

Thanks, Frieder

---

**Von:** Stroke Editorial Office [[stroke@strokeahajournal.org](mailto:stroke@strokeahajournal.org)]

**Gesendet:** Dienstag, 11. Dezember 2018 16:40

**An:** [fschlunk@gmail.com](mailto:fschlunk@gmail.com); Schlunk, Frieder

**Betreff:** [ext] Re: STROKE/2018/021732R1 (Secondary bleeding during acute experimental intracerebral h...)

Dear Dr. Schlunk,  
Where your questions regarding the deceased author? Here is what I sent on 12/4:

We will allow you to submit the revision, however please be aware that the issue is just being delayed. You will need to provide some proof from a legal representative or next of kin of the deceased author that they approve of the manuscript and will sign the publication forms. You may be able to check with MGH's Human Resources (via your Research Administrator) as they would likely have a point of contact. You might ask HR to send a letter to the family on your behalf.

As a last resort, perhaps there is something in writing from the institution that may be able to be used in place of a legal representative? The Scientific Publication Committee would need to approve this document. Do you have copies of emails sent or some other document attesting to the steps taken that include Dr. Arbel? AHA might want proof of a good faith effort to contact Dr. Arbel's family. Don't send anything yet; you should discuss the matter with your research administrator first to see if he or she could provide some documentation.

Please note, Dr. Frosch has not completed the copyright form. Once he completes it, please inform us and we can override the 2 forms for Michal Arbel to allow you to submit the revision.

Thank you,  
Pamela Lepkowski  
**Stroke** Editorial Office  
[stroke@strokeahajournal.org](mailto:stroke@strokeahajournal.org)

#### The International Stroke Conference - Connecting the World to Stroke Science!

[International Stroke Conference](#): Feb 6 - 8, 2019, Honolulu, HI *Education. Inspiration. Illumination.*

[State-of-the-Science Stroke Nursing Symposium](#) and [ISC Pre-Conference Symposia](#): Feb 5, 2019, Honolulu, HI

On Tue, Dec 11, 2018 at 9:33 AM <[fschlunk@gmail.com](mailto:fschlunk@gmail.com)> wrote:

Dear Editor,

A few days ago I sent an email with questions regarding our resubmission. Maybe you replied and I didn't receive the email? If yes maybe you can resend the email and cc [Frieder.Schlunk@charite.de](mailto:Frieder.Schlunk@charite.de)?

Thank you very much! Frieder Schlunk

---

**Stroke Editorial Office** <[stroke@strokeahajournal.org](mailto:stroke@strokeahajournal.org)>  
To: "Schlunk, Frieder" <[frieder.schlunk@charite.de](mailto:frieder.schlunk@charite.de)>

Thu, Dec 13, 2018 at 10:14 AM

Dear Dr. Schlunk,

I'm sorry you are having trouble with your revision. Please delete the old files and upload only your new files. Those will be the ones that are used to create the new pdf.

Yes, the visual abstract needs to be included with your revision. We will not be able to process it until this is included.

Best,  
Pamela Lepkowski





Dear Pamela Lepkowski,

we were finally able to reach Matthew Frosch and his electronic form is now completed. Very sorry for the delay! The files are all uploaded but I can still not proceed with the submission since Michal Arbels electronic forms are not provided yet. Can you help?

Thanks, Frieder

---

**Von:** Stroke Editorial Office [[stroke@strokeahajournal.org](mailto:stroke@strokeahajournal.org)]

**Gesendet:** Dienstag, 11. Dezember 2018 16:40

**An:** [fschlunk@gmail.com](mailto:fschlunk@gmail.com); Schlunk, Frieder

**Betreff:** [ext] Re: STROKE/2018/021732R1 (Secondary bleeding during acute experimental intracerebral h...)

Dear Dr. Schlunk,

Where your questions regarding the deceased author? Here is what I sent on 12/4:

We will allow you to submit the revision, however please be aware that the issue is just being delayed. You will need to provide some proof from a legal representative or next of kin of the deceased author that they approve of the manuscript and will sign the publication forms. You may be able to check with MGH's Human Resources (via your Research Administrator) as they would likely have a point of contact. You might ask HR to send a letter to the family on your behalf.

As a last resort, perhaps there is something in writing from the institution that may be able to be used in place of a legal representative? The Scientific Publication Committee would need to approve this document. Do you have copies of emails sent or some other document attesting to the steps taken that include Dr. Arbel? AHA might want proof of a good faith effort to contact Dr. Arbel's family. Don't send anything yet; you should discuss the matter with your research administrator first to see if he or she could provide some documentation.

Please note, Dr. Frosch has not completed the copyright form. Once he completes it, please inform us and we can override the 2 forms for Michal Arbel to allow you to submit the revision.

Thank you,  
Pamela Lepkowski  
**Stroke** Editorial Office  
[stroke@strokeahajournal.org](mailto:stroke@strokeahajournal.org)

**The International Stroke Conference - Connecting the World to Stroke Science!**

[International Stroke Conference](#): Feb 6 - 8, 2019, Honolulu, HI *Education. Inspiration. Illumination.*

[State-of-the-Science Stroke Nursing Symposium](#) and [ISC Pre-Conference Symposia](#): Feb 5, 2019, Honolulu, HI

On Tue, Dec 11, 2018 at 9:33 AM <[fschlunk@gmail.com](mailto:fschlunk@gmail.com)> wrote:

Dear Editor,

A few days ago I sent an email with questions regarding our resubmission. Maybe you replied and I didn't receive the email? If yes maybe you can resend the email and cc [Frieder.Schlunk@charite.de](mailto:Frieder.Schlunk@charite.de)?

Thank you very much! Frieder Schlunk

---

**Schlunk, Frieder** <[frieder.schlunk@charite.de](mailto:frieder.schlunk@charite.de)>  
To: Stroke Editorial Office <[stroke@strokeahajournal.org](mailto:stroke@strokeahajournal.org)>

Fri, Dec 14, 2018 at 4:59 AM

Dear Pamela Lepkowski,

thank you for letting me know. We will resubmit as soon as possible.

Thanks again, Frieder Schlunk

---

**Von:** Stroke Editorial Office [[stroke@strokeahajournal.org](mailto:stroke@strokeahajournal.org)]

**Gesendet:** Donnerstag, 13. Dezember 2018 16:14

**An:** Schlunk, Frieder

**Betreff:** Re: [ext] Re: STROKE/2018/021732R1 (Secondary bleeding during acute experimental intracerebral h...)

Dear Dr. Schlunk,

I'm sorry you are having trouble with your revision. Please delete the old files and upload only your new files. Those will be the ones that are used to create the new pdf.

Yes, the visual abstract needs to be included with your revision. We will not be able to process it until this is included.

Best,  
Pamela Lepkowski

**Stroke** Editorial Office  
[stroke@strokeahajournal.org](mailto:stroke@strokeahajournal.org)

**The International Stroke Conference - Connecting the World to Stroke Science!**

[International Stroke Conference](#): Feb 6 - 8, 2019, Honolulu, HI *Education. Inspiration. Illumination.*

[State-of-the-Science Stroke Nursing Symposium](#) and [ISC Pre-Conference Symposia](#): Feb 5, 2019, Honolulu, HI

On Wed, Dec 12, 2018 at 1:21 PM Schlunk, Frieder <[frieder.schlunk@charite.de](mailto:frieder.schlunk@charite.de)> wrote:

Dear Pamela Lepkowski,

please see my questions below in your email

Dear Dr. Schlunk,

Thank you for letting us know. I have marked the forms complete for Dr. Dr. Arbel (for now).

*Thank you very much! That is a great help!*

Please double check the files. The manuscript file that is converted to PDF seems to be from 07/23/2018 (first version) and I don't see a visual abstract uploaded. Those 2 items I could quickly identify. I did not go thru your whole submission.

*I uploaded the manuscript with our modifications highlighted. For some reason the old version of the manuscript was uploaded too. I am not sure why and will try to remove it.*

*Is it necessary to upload the visual abstract already now? I understood that it can be uploaded at a later time point. Would that be possible?*

You may make the tracked changes version the Manuscript File (so that it will convert to PDF) if that is easier, but we don't want the original ms shown in the r1 version.

*See further above. Thanks again!!*

Please let me know if you have any further questions.

Thank you,  
Pamela Lepkowski

**Stroke** Editorial Office  
[stroke@strokeahajournal.org](mailto:stroke@strokeahajournal.org)

**The International Stroke Conference - Connecting the World to Stroke Science!**

[International Stroke Conference](#): Feb 6 - 8, 2019, Honolulu, HI *Education. Inspiration. Illumination.*  
[State-of-the-Science Stroke Nursing Symposium](#) and [ISC Pre-Conference Symposia](#): Feb 5, 2019, Honolulu, HI

On Wed, Dec 12, 2018 at 9:02 AM Schlunk, Frieder <[frieder.schlunk@charite.de](mailto:frieder.schlunk@charite.de)> wrote:

Dear Pamela Lepkowski,

we were finally able to reach Matthew Frosch and his electronic form is now completed. Very sorry for the delay! The files are all uploaded but I can still not proceed with the submission since Michal Arbels electronic forms are not provided yet. Can you help?

Thanks, Frieder

---

**Von:** Stroke Editorial Office [[stroke@strokeahajournal.org](mailto:stroke@strokeahajournal.org)]  
**Gesendet:** Dienstag, 11. Dezember 2018 16:40  
**An:** [fschlunk@gmail.com](mailto:fschlunk@gmail.com); Schlunk, Frieder  
**Betreff:** [ext] Re: STROKE/2018/021732R1 (Secondary bleeding during acute experimental intracerebral h...)

Dear Dr. Schlunk,  
Where your questions regarding the deceased author? Here is what I sent on 12/4:

We will allow you to submit the revision, however please be aware that the issue is just being delayed. You will need to provide some proof from a legal representative or next of kin of the deceased author that they approve of the manuscript and will sign the publication forms. You may be able to check with MGH's Human Resources (via your Research Administrator) as they would likely have a point of contact. You might ask HR to send a letter to the family on your behalf.

As a last resort, perhaps there is something in writing from the institution that may be able to be used in place of a legal representative? The Scientific Publication Committee would need to approve this document. Do you have copies of emails sent or some other document attesting to the steps taken that include Dr. Arbel? AHA might want proof of a good faith effort to contact Dr. Arbel's family. Don't send anything yet; you should discuss the matter with your research administrator first to see if he or she could provide some documentation.

Please note, Dr. Frosch has not completed the copyright form. Once he completes it, please inform us and we can override the 2 forms for Michal Arbel to allow you to submit the revision.

Thank you,  
Pamela Lepkowski  
**Stroke** Editorial Office  
[stroke@strokeahajournal.org](mailto:stroke@strokeahajournal.org)

**The International Stroke Conference - Connecting the World to Stroke Science!**

[International Stroke Conference](#): Feb 6 - 8, 2019, Honolulu, HI *Education. Inspiration. Illumination.*  
[State-of-the-Science Stroke Nursing Symposium](#) and [ISC Pre-Conference Symposia](#): Feb 5, 2019, Honolulu, HI



our co-author?

Thanks again for your help!

Frieder Schlunk

**Erinn Cain** <ecain@strokeahajournal.org>  
To: Stroke Editorial Office <stroke@strokeahajournal.org>  
Cc: Rebecca Seastrong <rseastrong@strokeahajournal.org>

Thu, Jan 17, 2019 at 11:38 AM

Hi Pamela,

Please ask the corresponding author to provide the name and email address for the the deceased author's designee. You can then update the author's email address to be that of the designee (and add a sticky note that you did this). You can then send the email requests for the electronic forms to the designee through the system.

Thank you,

Erinn

On Thu, Jan 17, 2019 at 11:15 AM Stroke Editorial Office <stroke@strokeahajournal.org> wrote:

Hello Erinn and Rebecca,

Do we have a form that can be emailed to them? The email to complete the form was sent by email to the deceased. What's the best way to get one to the corresponding author?

thanks,  
pamela

**Stroke** Editorial Office  
[stroke@strokeahajournal.org](mailto:stroke@strokeahajournal.org)

**The International Stroke Conference - Connecting the World to Stroke Science!**



**SAVE the DATE International Stroke Conference 2019!**  
**Feb 6-8** Hawaii Convention Center  
Honolulu, Hawaii

**Housing & Registration Opens:**  
**FAHA/VIP: Sept 26, 2018**    **Nonmembers: Oct 10, 2018**  
**Members: Oct 3, 2018**

American Heart Association | American Stroke Association | INTERNATIONAL STROKE CONFERENCE 2019

**International Stroke Conference:** Feb 6 - 8, 2019, Honolulu, HI    *Education. Inspiration. Illumination.*

**State-of-the-Science Stroke Nursing Symposium and ISC Pre-Conference Symposia:** Feb 5, 2019, Honolulu, HI

----- Forwarded message -----

From: **Schlunk, Frieder** <[frieder.schlunk@charite.de](mailto:frieder.schlunk@charite.de)>

Date: Thu, Jan 17, 2019 at 10:58 AM

Subject: AW: [ext] Re: STROKE/2018/021732R1 (Secondary bleeding during acute experimental intracerebral h...)

To: Stroke Editorial Office <[stroke@strokeahajournal.org](mailto:stroke@strokeahajournal.org)>

Dear Pamela Lepkowski,

we recieved the decision letter from STROKE and will provide you with the necessary forms as soon as possible. Do you have a link or a pdf file for the forms (Authorship Responsibility and Copyright Transfer Agreement) in order to send it to the husband of our co-author?

Thanks again for your help!

Frieder Schlunk



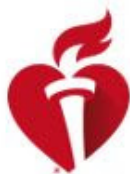

**Erinn Cain**

Assistant Managing Editor, *Stroke*  
**American Heart Association**  
 200 5<sup>th</sup> Avenue | Waltham | MA | 02451  
 O 781.902.4412

**Stroke Editorial Office** <stroke@strokeahajournal.org>  
 To: "Schlunk, Frieder" <frieder.schlunk@charite.de>, "Ayata, Cenk, M.D." <cayata@partners.org>

Thu, Jan 17, 2019 at 11:49 AM

Dear Dr. Schlunk,  
 Please provide the name and email address for the the deceased author's designee. Once we have that information, we can update our files and send the email requests for the electronic forms to the designee through the system. We only can accept forms completed online.

Thank you,  
 Pamela

**Stroke** Editorial Office  
[stroke@strokeahajournal.org](mailto:stroke@strokeahajournal.org)

**The International Stroke Conference - Connecting the World to Stroke Science!**

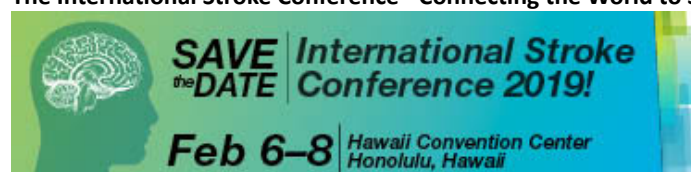

**Housing & Registration Opens:**

**FAHA/VIP: Sept 26, 2018**

**Nonmembers: Oct 10, 2018**

**Members: Oct 3, 2018**

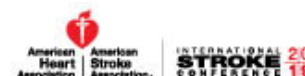

**International Stroke Conference:** Feb 6 - 8, 2019, Honolulu, HI *Education. Inspiration. Illumination.*  
**State-of-the-Science Stroke Nursing Symposium and ISC Pre-Conference Symposia:** Feb 5, 2019, Honolulu, HI

On Thu, Jan 17, 2019 at 10:58 AM Schlunk, Frieder <frieder.schlunk@charite.de> wrote:

Dear Pamela Lepkowski,

we recieved the decision letter from STROKE and will provide you with the necessary forms as soon as possible. Do you have a link or a pdf file for the forms (Authorship Responsibility and Copyright Transfer Agreement) in order to send it to the husband of our co-author?

Thanks again for your help!

Frieder Schlunk

**Stroke Editorial Office** <stroke@strokeahajournal.org>  
 To: Erinn Cain <ecain@strokeahajournal.org>  
 Cc: Rebecca Seastrong <rseastrong@strokeahajournal.org>

Thu, Jan 17, 2019 at 11:49 AM

Thanks Erinn. Will await the information and then send the forms.

**Stroke** Editorial Office  
[stroke@strokeahajournal.org](mailto:stroke@strokeahajournal.org)

**The International Stroke Conference - Connecting the World to Stroke Science!**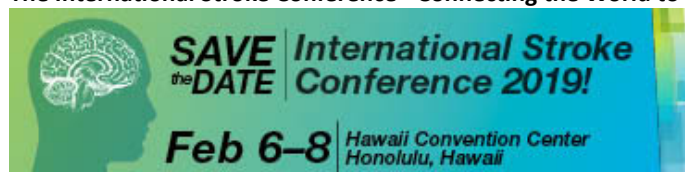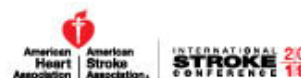**Housing & Registration Opens:**

FAHA/VIP: Sept 26, 2018

Nonmembers: Oct 10, 2018

Members: Oct 3, 2018

International Stroke Conference: Feb 6 - 8, 2019, Honolulu, HI *Education. Inspiration. Illumination.*

State-of-the-Science Stroke Nursing Symposium and ISC Pre-Conference Symposia: Feb 5, 2019, Honolulu, HI

On Thu, Jan 17, 2019 at 11:38 AM Erinn Cain <[ecain@strokeahajournal.org](mailto:ecain@strokeahajournal.org)> wrote:

Hi Pamela,

Please ask the corresponding author to provide the name and email address for the the deceased author's designee. You can then update the author's email address to be that of the designee (and add a sticky note that you did this). You can then send the email requests for the electronic forms to the designee through the system.

Thank you,

Erinn

On Thu, Jan 17, 2019 at 11:15 AM Stroke Editorial Office <[stroke@strokeahajournal.org](mailto:stroke@strokeahajournal.org)> wrote:

Hello Erinn and Rebecca,

Do we have a form that can be emailed to them? The email to complete the form was sent by email to the deceased. What's the best way to get one to the corresponding author?

thanks,

pamela

**Stroke** Editorial Office

[stroke@strokeahajournal.org](mailto:stroke@strokeahajournal.org)

**The International Stroke Conference - Connecting the World to Stroke Science!**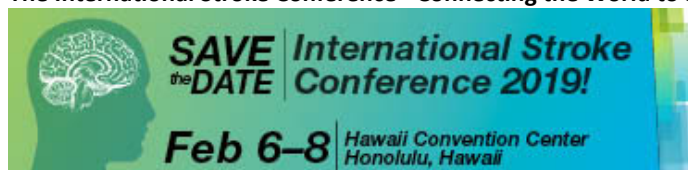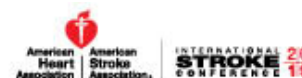**Housing & Registration Opens:**

FAHA/VIP: Sept 26, 2018

Nonmembers: Oct 10, 2018

Members: Oct 3, 2018

International Stroke Conference: Feb 6 - 8, 2019, Honolulu, HI *Education. Inspiration. Illumination.*

State-of-the-Science Stroke Nursing Symposium and ISC Pre-Conference Symposia: Feb 5, 2019, Honolulu, HI

----- Forwarded message -----

From: **Schlunk, Frieder** <[frieder.schlunk@charite.de](mailto:frieder.schlunk@charite.de)>

Date: Thu, Jan 17, 2019 at 10:58 AM

Subject: AW: [ext] Re: STROKE/2018/021732R1 (Secondary bleeding during acute experimental intracerebral h...)

To: Stroke Editorial Office <[stroke@strokeahajournal.org](mailto:stroke@strokeahajournal.org)>

Dear Pamela Lepkowski,

we recieved the decision letter from STROKE and will provide you with the necessary forms as soon as possible. Do you have a link or a pdf file for the forms (Authorship Responsibility and Copyright Transfer Agreement) in order to send it to the husband of our co-author?

Thanks again for your help!

Frieder Schlunk

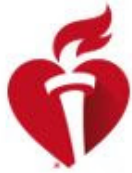

**Erinn Cain**

Assistant Managing Editor, *Stroke*  
**American Heart Association**  
 200 5<sup>th</sup> Avenue | Waltham | MA | 02451  
 O 781.902.4412

**Schlunk, Frieder** <frieder.schlunk@charite.de>  
 To: Stroke Editorial Office <stroke@strokeahajournal.org>

Thu, Jan 17, 2019 at 4:37 PM

Dear Pamela Lepkowski,

thank you very much! Our co-authors husbands email address is [roy\\_ornath@yahoo.com](mailto:roy_ornath@yahoo.com). He is expecting you to email him.

Best, Frieder

**Von:** Stroke Editorial Office [[stroke@strokeahajournal.org](mailto:stroke@strokeahajournal.org)]

**Gesendet:** Donnerstag, 17. Januar 2019 17:49

**An:** Schlunk, Frieder; Ayata, Cenk, M.D.

**Betreff:** Re: [ext] Re: STROKE/2018/021732R1 (Secondary bleeding during acute experimental intracerebral h...)

Dear Dr. Schlunk,

Please provide the name and email address for the the deceased author's designee. Once we have that information, we can update our files and send the email requests for the electronic forms to the designee through the system. We only can accept forms completed online.

Thank you,  
 Pamela

**Stroke** Editorial Office  
[stroke@strokeahajournal.org](mailto:stroke@strokeahajournal.org)

**The International Stroke Conference - Connecting the World to Stroke Science!**

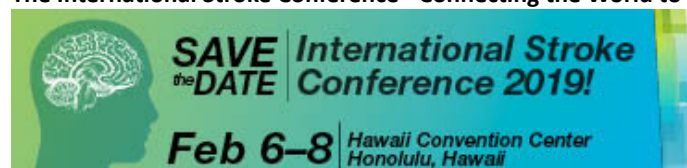

**Housing & Registration Opens:**

**FAHA/VIP:** Sept 26, 2018

**Nonmembers:** Oct 10, 2018

**Members:** Oct 3, 2018

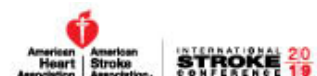

**International Stroke Conference:** Feb 6 - 8, 2019, Honolulu, HI *Education. Inspiration. Illumination.*

**State-of-the-Science Stroke Nursing Symposium and ISC Pre-Conference Symposia:** Feb 5, 2019, Honolulu, HI

On Thu, Jan 17, 2019 at 10:58 AM Schlunk, Frieder <frieder.schlunk@charite.de> wrote:

Dear Pamela Lepkowski,

we recieved the decision letter from STROKE and will provide you with the necessary forms as soon as possible. Do you have a link or a pdf file for the forms (Authorship Responsibility and Copyright Transfer Agreement) in order to send it to the husband of our co-author?

Thanks again for your help!

Frieder Schlunk

---

**Stroke Editorial Office** <stroke@strokeahajournal.org>

Fri, Jan 18, 2019 at 9:15 AM

To: "Schlunk, Frieder" <frieder.schlunk@charite.de>, "Ayata, Cenk, M.D." <cayata@partners.org>

Dear Dr. Schlunk,

Thank you for sending the email address. Could you please confirm the complete name and that he will be the designee.

Best,

Pamela

**Stroke** Editorial Office

stroke@strokeahajournal.org

**The International Stroke Conference - Connecting the World to Stroke Science!**

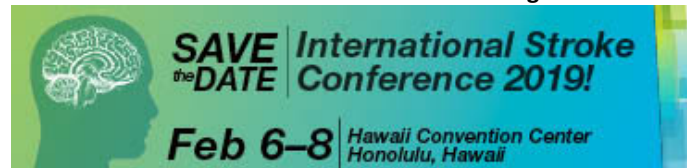

**Housing & Registration Opens:**

**FAHA/VIP:** Sept 26, 2018

**Nonmembers:** Oct 10, 2018

**Members:** Oct 3, 2018

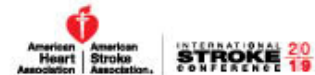

**International Stroke Conference:** Feb 6 - 8, 2019, Honolulu, HI *Education. Inspiration. Illumination.*

**State-of-the-Science Stroke Nursing Symposium and ISC Pre-Conference Symposia:** Feb 5, 2019, Honolulu, HI

On Thu, Jan 17, 2019 at 4:38 PM Schlunk, Frieder <frieder.schlunk@charite.de> wrote:

Dear Pamela Lepkowski,

thank you very much! Our co-authors husbands email address is [roy\\_ornath@yahoo.com](mailto:roy_ornath@yahoo.com). He is expecting you to email him.

Best, Frieder

**Von:** Stroke Editorial Office [[stroke@strokeahajournal.org](mailto:stroke@strokeahajournal.org)]

**Gesendet:** Donnerstag, 17. Januar 2019 17:49

**An:** Schlunk, Frieder; Ayata, Cenk, M.D.

**Betreff:** Re: [ext] Re: STROKE/2018/021732R1 (Secondary bleeding during acute experimental intracerebral h...)

Dear Dr. Schlunk,

Please provide the name and email address for the the deceased author's designee. Once we have that information, we can update our files and send the email requests for the electronic forms to the designee through the system. We only can accept forms completed online.

Thank you,  
Pamela

**Stroke** Editorial Office  
[stroke@strokeahajournal.org](mailto:stroke@strokeahajournal.org)

The International Stroke Conference - Connecting the World to Stroke Science!



**SAVE the DATE International Stroke Conference 2019!**  
**Feb 6-8** Hawaii Convention Center Honolulu, Hawaii

**Housing & Registration Opens:**  
**FAHA/VIP:** Sept 26, 2018    **Nonmembers:** Oct 10, 2018  
**Members:** Oct 3, 2018

American Heart Association | American Stroke Association | INTERNATIONAL STROKE CONFERENCE 2019

International Stroke Conference: Feb 6 - 8, 2019, Honolulu, HI    *Education. Inspiration. Illumination.*

State-of-the-Science Stroke Nursing Symposium and ISC Pre-Conference Symposia: Feb 5, 2019, Honolulu, HI

On Thu, Jan 17, 2019 at 10:58 AM Schlunk, Frieder <[frieder.schlunk@charite.de](mailto:frieder.schlunk@charite.de)> wrote:

Dear Pamela Lepkowski,

we recieved the decision letter from STROKE and will provide you with the necessary forms as soon as possible. Do you have a link or a pdf file for the forms (Authorship Responsibility and Copyright Transfer Agreement) in order to send it to the husband of our co-author?

Thanks again for your help!

Frieder Schlunk

**Schlunk, Frieder** <[frieder.schlunk@charite.de](mailto:frieder.schlunk@charite.de)>  
To: Stroke Editorial Office <[stroke@strokeahajournal.org](mailto:stroke@strokeahajournal.org)>

Sun, Jan 20, 2019 at 6:44 AM

Dear Pamela,

that's correct. His name is Roy Ornath.

Thanks, Frieder

**Von:** Stroke Editorial Office [[stroke@strokeahajournal.org](mailto:stroke@strokeahajournal.org)]

**Gesendet:** Freitag, 18. Januar 2019 15:15

**An:** Schlunk, Frieder; Ayata, Cenk, M.D.

**Betreff:** Re: [ext] Re: STROKE/2018/021732R1 (Secondary bleeding during acute experimental intracerebral h...)

Dear Dr. Schlunk,

Thank you for sending the email address. Could you please confirm the complete name and that he will be the designee.

Best,  
Pamela

**Stroke** Editorial Office  
[stroke@strokeahajournal.org](mailto:stroke@strokeahajournal.org)

The International Stroke Conference - Connecting the World to Stroke Science!

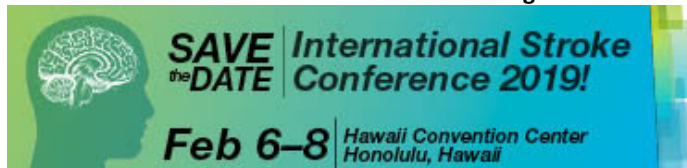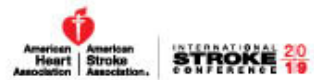

Housing & Registration Opens:

FAHA/VIP: Sept 26, 2018

Nonmembers: Oct 10, 2018

Members: Oct 3, 2018

International Stroke Conference: Feb 6 - 8, 2019, Honolulu, HI *Education. Inspiration. Illumination.*  
 State-of-the-Science Stroke Nursing Symposium and ISC Pre-Conference Symposia: Feb 5, 2019, Honolulu, HI

On Thu, Jan 17, 2019 at 4:38 PM Schlunk, Frieder <[frieder.schlunk@charite.de](mailto:frieder.schlunk@charite.de)> wrote:

Dear Pamela Lepkowski,

thank you very much! Our co-authors husbands email address is [roy\\_ornath@yahoo.com](mailto:roy_ornath@yahoo.com). He is expecting you to email him.

Best, Frieder

**Von:** Stroke Editorial Office [[stroke@strokeahajournal.org](mailto:stroke@strokeahajournal.org)]

**Gesendet:** Donnerstag, 17. Januar 2019 17:49

**An:** Schlunk, Frieder; Ayata, Cenk, M.D.

**Betreff:** Re: [ext] Re: STROKE/2018/021732R1 (Secondary bleeding during acute experimental intracerebral h...)

Dear Dr. Schlunk,

Please provide the name and email address for the the deceased author's designee. Once we have that information, we can update our files and send the email requests for the electronic forms to the designee through the system. We only can accept forms completed online.

Thank you,  
 Pamela

**Stroke** Editorial Office  
[stroke@strokeahajournal.org](mailto:stroke@strokeahajournal.org)

The International Stroke Conference - Connecting the World to Stroke Science!

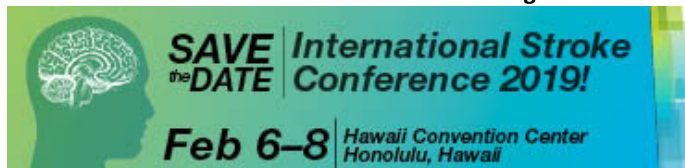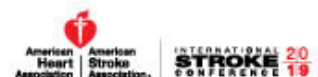

Housing & Registration Opens:

FAHA/VIP: Sept 26, 2018

Nonmembers: Oct 10, 2018

Members: Oct 3, 2018

International Stroke Conference: Feb 6 - 8, 2019, Honolulu, HI *Education. Inspiration. Illumination.*  
 State-of-the-Science Stroke Nursing Symposium and ISC Pre-Conference Symposia: Feb 5, 2019, Honolulu, HI

On Thu, Jan 17, 2019 at 10:58 AM Schlunk, Frieder <[frieder.schlunk@charite.de](mailto:frieder.schlunk@charite.de)> wrote:

Dear Pamela Lepkowski,



we recieved the decision letter from STROKE and will provide you with the necessary forms as soon as possible. Do you have a link or a pdf file for the forms (Authorship Responsibility and Copyright Transfer Agreement) in order to send it to the husband of our co-author?

Thanks again for your help!

Frieder Schlunk

---

**Stroke Editorial Office** <stroke@strokeahajournal.org>  
To: "Schlunk, Frieder" <frieder.schlunk@charite.de>

Tue, Jan 22, 2019 at 9:43 AM

Dear Dr. Schlunk,  
Thank you for confirming. I've just sent the 2 emails with links to the forms to Mr. Ornath.

Thanks again,  
Pamela

**Stroke** Editorial Office  
[stroke@strokeahajournal.org](mailto:stroke@strokeahajournal.org)

**The International Stroke Conference - Connecting the World to Stroke Science!**

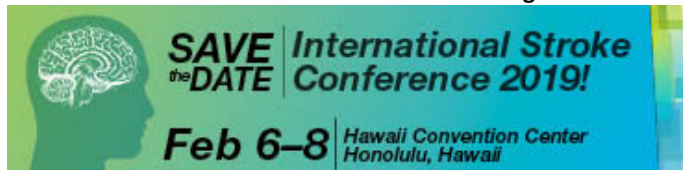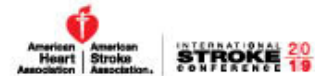

**Housing & Registration Opens:**

**FAHA/VIP:** Sept 26, 2018

**Nonmembers:** Oct 10, 2018

**Members:** Oct 3, 2018

[International Stroke Conference](#): Feb 6 - 8, 2019, Honolulu, HI *Education. Inspiration. Illumination.*  
[State-of-the-Science Stroke Nursing Symposium](#) and [ISC Pre-Conference Symposia](#): Feb 5, 2019, Honolulu, HI

On Sun, Jan 20, 2019 at 6:44 AM Schlunk, Frieder <frieder.schlunk@charite.de> wrote:

Dear Pamela,

that's correct. His name is Roy Ornath.

Thanks, Frieder

---

**Von:** Stroke Editorial Office [[stroke@strokeahajournal.org](mailto:stroke@strokeahajournal.org)]

**Gesendet:** Freitag, 18. Januar 2019 15:15

**An:** Schlunk, Frieder; Ayata, Cenk, M.D.

**Betreff:** Re: [ext] Re: STROKE/2018/021732R1 (Secondary bleeding during acute experimental intracerebral h...)

Dear Dr. Schlunk,  
Thank you for sending the email address. Could you please confirm the complete name and that he will be the designee.

Best,  
Pamela

**Stroke** Editorial Office  
[stroke@strokeahajournal.org](mailto:stroke@strokeahajournal.org)

**The International Stroke Conference - Connecting the World to Stroke Science!**

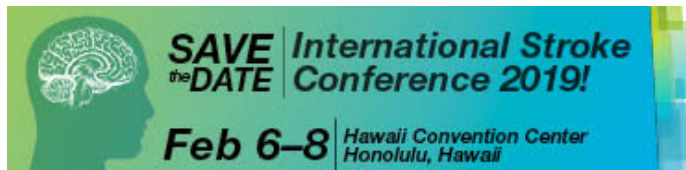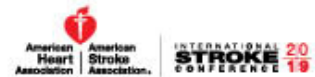

**Housing & Registration Opens:**

**FAHA/VIP:** Sept 26, 2018

**Nonmembers:** Oct 10, 2018

**Members:** Oct 3, 2018

[International Stroke Conference](#): Feb 6 - 8, 2019, Honolulu, HI *Education. Inspiration. Illumination.*

[State-of-the-Science Stroke Nursing Symposium](#) and [ISC Pre-Conference Symposia](#): Feb 5, 2019, Honolulu, HI

On Thu, Jan 17, 2019 at 4:38 PM Schlunk, Frieder <[frieder.schlunk@charite.de](mailto:frieder.schlunk@charite.de)> wrote:

Dear Pamela Lepkowski,

thank you very much! Our co-authors husbands email address is [roy\\_ornath@yahoo.com](mailto:roy_ornath@yahoo.com). He is expecting you to email him.

Best, Frieder

**Von:** Stroke Editorial Office [[stroke@strokeahajournal.org](mailto:stroke@strokeahajournal.org)]

**Gesendet:** Donnerstag, 17. Januar 2019 17:49

**An:** Schlunk, Frieder; Ayata, Cen, M.D.

**Betreff:** Re: [ext] Re: STROKE/2018/021732R1 (Secondary bleeding during acute experimental intracerebral h...)

Dear Dr. Schlunk,

Please provide the name and email address for the the deceased author's designee. Once we have that information, we can update our files and send the email requests for the electronic forms to the designee through the system. We only can accept forms completed online.

Thank you,  
Pamela

**Stroke** Editorial Office  
[stroke@strokeahajournal.org](mailto:stroke@strokeahajournal.org)

**The International Stroke Conference - Connecting the World to Stroke Science!**

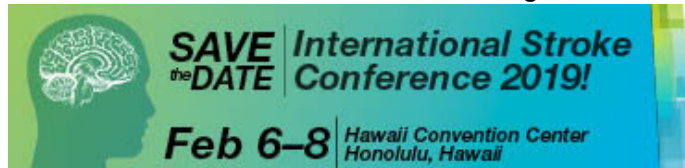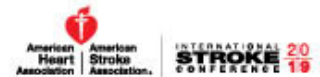

**Housing & Registration Opens:**

**FAHA/VIP:** Sept 26, 2018

**Nonmembers:** Oct 10, 2018

**Members:** Oct 3, 2018

[International Stroke Conference](#): Feb 6 - 8, 2019, Honolulu, HI *Education. Inspiration. Illumination.*

[State-of-the-Science Stroke Nursing Symposium](#) and [ISC Pre-Conference Symposia](#): Feb 5, 2019, Honolulu, HI

On Thu, Jan 17, 2019 at 10:58 AM Schlunk, Frieder <[frieder.schlunk@charite.de](mailto:frieder.schlunk@charite.de)> wrote:

Dear Pamela Lepkowski,

2/25/2019

Stroke AHA Journal Mail - STROKE/2018/021732R1 (Secondary bleeding during acute experimental intracerebral h...)

we recieved the decision letter from STROKE and will provide you with the necessary forms as soon as possible. Do you have a link or a pdf file for the forms (Authorship Responsibility and Copyright Transfer Agreement) in order to send it to the husband of our co-author?

Thanks again for your help!

Frieder Schlunk

---

**Schlunk, Frieder** <frieder.schlunk@charite.de>  
To: Stroke Editorial Office <stroke@strokeahajournal.org>

Thu, Jan 31, 2019 at 6:17 AM

Dear Pamela,

did you receive the forms for Michal Arbel?

Thanks very much! Frieder

---

**Von:** Stroke Editorial Office [[stroke@strokeahajournal.org](mailto:stroke@strokeahajournal.org)]

**Gesendet:** Dienstag, 22. Januar 2019 15:43

**An:** Schlunk, Frieder

**Betreff:** Re: [ext] Re: STROKE/2018/021732R1 (Secondary bleeding during acute experimental intracerebral h...)

Dear Dr. Schlunk,

Thank you for confirming. I've just sent the 2 emails with links to the forms to Mr. Ornath.

Thanks again,  
Pamela

**Stroke** Editorial Office  
[stroke@strokeahajournal.org](mailto:stroke@strokeahajournal.org)

**The International Stroke Conference - Connecting the World to Stroke Science!**

**International Stroke Conference:** Feb 6 - 8, 2019, Honolulu, HI *Education. Inspiration. Illumination.*

**State-of-the-Science Stroke Nursing Symposium and ISC Pre-Conference Symposia:** Feb 5, 2019, Honolulu, HI

---

On Sun, Jan 20, 2019 at 6:44 AM Schlunk, Frieder <[frieder.schlunk@charite.de](mailto:frieder.schlunk@charite.de)> wrote:

Dear Pamela,

that's correct. His name is Roy Ornath.

Thanks, Frieder

---

**Von:** Stroke Editorial Office [[stroke@strokeahajournal.org](mailto:stroke@strokeahajournal.org)]

**Gesendet:** Freitag, 18. Januar 2019 15:15

**An:** Schlunk, Frieder; Ayata, Cenk, M.D.

**Betreff:** Re: [ext] Re: STROKE/2018/021732R1 (Secondary bleeding during acute experimental intracerebral h...)

Dear Dr. Schlunk,

Thank you for sending the email address. Could you please confirm the complete name and that he will be the designee.

Best,  
Pamela

**Stroke** Editorial Office  
[stroke@strokeahajournal.org](mailto:stroke@strokeahajournal.org)

**The International Stroke Conference - Connecting the World to Stroke Science!**

[International Stroke Conference](#): Feb 6 - 8, 2019, Honolulu, HI *Education. Inspiration. Illumination.*  
[State-of-the-Science Stroke Nursing Symposium](#) and [ISC Pre-Conference Symposia](#): Feb 5, 2019, Honolulu, HI

On Thu, Jan 17, 2019 at 4:38 PM Schlunk, Frieder <[frieder.schlunk@charite.de](mailto:frieder.schlunk@charite.de)> wrote:

Dear Pamela Lepkowski,

thank you very much! Our co-authors husbands email address is [roy\\_ornath@yahoo.com](mailto:roy_ornath@yahoo.com). He is expecting you to email him.

Best, Frieder

**Von:** Stroke Editorial Office [[stroke@strokeahajournal.org](mailto:stroke@strokeahajournal.org)]

**Gesendet:** Donnerstag, 17. Januar 2019 17:49

**An:** Schlunk, Frieder; Ayata, Cenk, M.D.

**Betreff:** Re: [ext] Re: STROKE/2018/021732R1 (Secondary bleeding during acute experimental intracerebral h...)

Dear Dr. Schlunk,

Please provide the name and email address for the the deceased author's designee. Once we have that information, we can update our files and send the email requests for the electronic forms to the designee through the system. We only can accept forms completed online.

Thank you,  
Pamela

**Stroke** Editorial Office  
[stroke@strokeahajournal.org](mailto:stroke@strokeahajournal.org)

**The International Stroke Conference - Connecting the World to Stroke Science!**

[International Stroke Conference](#): Feb 6 - 8, 2019, Honolulu, HI *Education. Inspiration. Illumination.*  
[State-of-the-Science Stroke Nursing Symposium](#) and [ISC Pre-Conference Symposia](#): Feb 5, 2019, Honolulu, HI

On Thu, Jan 17, 2019 at 10:58 AM Schlunk, Frieder <[frieder.schlunk@charite.de](mailto:frieder.schlunk@charite.de)> wrote:

Dear Pamela Lepkowski,

we recieved the decision letter from STROKE and will provide you with the necessary forms as soon as possible. Do you have a link or a pdf file for the forms (Authorship Responsibility and Copyright Transfer Agreement) in order to send it to the husband of our co-author?

Thanks again for your help!

Frieder Schlunk

**Stroke Editorial Office** <stroke@strokeahajournal.org>

Thu, Jan 31, 2019 at 9:33 AM

To: "Schlunk, Frieder" <frieder.schlunk@charite.de>, "Ayata, Cenk, M.D." <cayata@partners.org>

Dear Dr. Schlunk,

Unfortunately not. I sent the forms on 1/22 and just resent both forms today. They were sent to [roy\\_ornath@yahoo.com](mailto:roy_ornath@yahoo.com)

Thank you,  
Pamela

**Stroke** Editorial Office  
[stroke@strokeahajournal.org](mailto:stroke@strokeahajournal.org)

**The International Stroke Conference - Connecting the World to Stroke Science!**

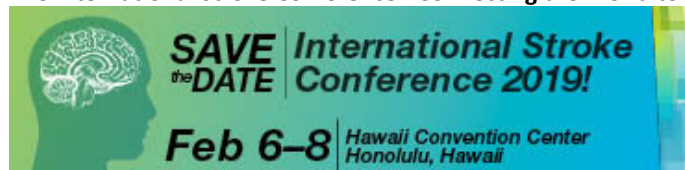

**Housing & Registration Opens:**

**FAHA/VIP:** Sept 26, 2018

**Nonmembers:** Oct 10, 2018

**Members:** Oct 3, 2018

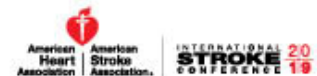

**International Stroke Conference:** Feb 6 - 8, 2019, Honolulu, HI *Education. Inspiration. Illumination.*

**State-of-the-Science Stroke Nursing Symposium and ISC Pre-Conference Symposia:** Feb 5, 2019, Honolulu, HI

On Thu, Jan 31, 2019 at 6:18 AM Schlunk, Frieder <frieder.schlunk@charite.de> wrote:

Dear Pamela,

did you receive the forms for Michal Arbel?

Thanks very much! Frieder

**Von:** Stroke Editorial Office [[stroke@strokeahajournal.org](mailto:stroke@strokeahajournal.org)]

**Gesendet:** Dienstag, 22. Januar 2019 15:43

**An:** Schlunk, Frieder

**Betreff:** Re: [ext] Re: STROKE/2018/021732R1 (Secondary bleeding during acute experimental intracerebral h...)

Dear Dr. Schlunk,

Thank you for confirming. I've just sent the 2 emails with links to the forms to Mr. Ornath.

Thanks again,  
Pamela

**Stroke** Editorial Office  
[stroke@strokeahajournal.org](mailto:stroke@strokeahajournal.org)

**The International Stroke Conference - Connecting the World to Stroke Science!**

[International Stroke Conference](#): Feb 6 - 8, 2019, Honolulu, HI *Education. Inspiration. Illumination.*

[State-of-the-Science Stroke Nursing Symposium](#) and [ISC Pre-Conference Symposia](#): Feb 5, 2019, Honolulu, HI

On Sun, Jan 20, 2019 at 6:44 AM Schlunk, Frieder <[frieder.schlunk@charite.de](mailto:frieder.schlunk@charite.de)> wrote:

Dear Pamela,

that's correct. His name is Roy Ornath.

Thanks, Frieder

---

**Von:** Stroke Editorial Office [[stroke@strokeahajournal.org](mailto:stroke@strokeahajournal.org)]

**Gesendet:** Freitag, 18. Januar 2019 15:15

**An:** Schlunk, Frieder; Ayata, Cenk, M.D.

**Betreff:** Re: [ext] Re: STROKE/2018/021732R1 (Secondary bleeding during acute experimental intracerebral h...)

Dear Dr. Schlunk,

Thank you for sending the email address. Could you please confirm the complete name and that he will be the designee.

Best,

Pamela

**Stroke** Editorial Office

[stroke@strokeahajournal.org](mailto:stroke@strokeahajournal.org)

**The International Stroke Conference - Connecting the World to Stroke Science!**

[International Stroke Conference](#): Feb 6 - 8, 2019, Honolulu, HI *Education. Inspiration. Illumination.*

[State-of-the-Science Stroke Nursing Symposium](#) and [ISC Pre-Conference Symposia](#): Feb 5, 2019, Honolulu, HI

On Thu, Jan 17, 2019 at 4:38 PM Schlunk, Frieder <[frieder.schlunk@charite.de](mailto:frieder.schlunk@charite.de)> wrote:

Dear Pamela Lepkowski,

thank you very much! Our co-authors husbands email address is [roy\\_ornath@yahoo.com](mailto:roy_ornath@yahoo.com). He is expecting you to email him.

Best, Frieder

**Von:** Stroke Editorial Office [[stroke@strokeahajournal.org](mailto:stroke@strokeahajournal.org)]

**Gesendet:** Donnerstag, 17. Januar 2019 17:49

**An:** Schlunk, Frieder; Ayata, Cenk, M.D.

**Betreff:** Re: [ext] Re: STROKE/2018/021732R1 (Secondary bleeding during acute experimental intracerebral h...)

Dear Dr. Schlunk,

Please provide the name and email address for the the deceased author's designee. Once we have that information, we can update our files and send the email requests for the electronic forms to the designee through the system. We only can accept forms completed online.



Thank you,  
Pamela

**Stroke** Editorial Office  
[stroke@strokeahajournal.org](mailto:stroke@strokeahajournal.org)

**The International Stroke Conference - Connecting the World to Stroke Science!**

[International Stroke Conference](#): Feb 6 - 8, 2019, Honolulu, HI *Education. Inspiration. Illumination.*  
[State-of-the-Science Stroke Nursing Symposium](#) and [ISC Pre-Conference Symposia](#): Feb 5, 2019, Honolulu, HI

On Thu, Jan 17, 2019 at 10:58 AM Schlunk, Frieder <[frieder.schlunk@charite.de](mailto:frieder.schlunk@charite.de)> wrote:

Dear Pamela Lepkowski,

we recieved the decision letter from STROKE and will provide you with the necessary forms as soon as possible. Do you have a link or a pdf file for the forms (Authorship Responsibility and Copyright Transfer Agreement) in order to send it to the husband of our co-author?

Thanks again for your help!

Frieder Schlunk

---

**Schlunk, Frieder** <[frieder.schlunk@charite.de](mailto:frieder.schlunk@charite.de)>  
To: Stroke Editorial Office <[stroke@strokeahajournal.org](mailto:stroke@strokeahajournal.org)>

Thu, Feb 7, 2019 at 10:04 AM

Dear Pamela,

Roy Ornath just emailed me that he has completed the forms. Can you confirm that you received it?

Thanks so much!

Frieder

---

**Von:** Stroke Editorial Office [[stroke@strokeahajournal.org](mailto:stroke@strokeahajournal.org)]

**Gesendet:** Donnerstag, 31. Januar 2019 15:33

**An:** Schlunk, Frieder; Ayata, Cenk, M.D.

**Betreff:** Re: [ext] Re: STROKE/2018/021732R1 (Secondary bleeding during acute experimental intracerebral h...)

Dear Dr. Schlunk,  
Unfortunately not. I sent the forms on 1/22 and just resent both forms today. They were sent to [roy\\_ornath@yahoo.com](mailto:roy_ornath@yahoo.com)

Thank you,  
Pamela

**Stroke** Editorial Office  
[stroke@strokeahajournal.org](mailto:stroke@strokeahajournal.org)

**The International Stroke Conference - Connecting the World to Stroke Science!**

[International Stroke Conference](#): Feb 6 - 8, 2019, Honolulu, HI *Education. Inspiration. Illumination.*  
[State-of-the-Science Stroke Nursing Symposium](#) and [ISC Pre-Conference Symposia](#): Feb 5, 2019, Honolulu, HI

On Thu, Jan 31, 2019 at 6:18 AM Schlunk, Frieder <[frieder.schlunk@charite.de](mailto:frieder.schlunk@charite.de)> wrote:

Dear Pamela,

did you receive the forms for Michal Arbel?

Thanks very much! Frieder

---

**Von:** Stroke Editorial Office [[stroke@strokeahajournal.org](mailto:stroke@strokeahajournal.org)]

**Gesendet:** Dienstag, 22. Januar 2019 15:43

**An:** Schlunk, Frieder

**Betreff:** Re: [ext] Re: STROKE/2018/021732R1 (Secondary bleeding during acute experimental intracerebral h...)

Dear Dr. Schlunk,  
Thank you for confirming. I've just sent the 2 emails with links to the forms to Mr. Ornath.

Thanks again,  
Pamela

**Stroke** Editorial Office  
[stroke@strokeahajournal.org](mailto:stroke@strokeahajournal.org)

**The International Stroke Conference - Connecting the World to Stroke Science!**

[International Stroke Conference](#): Feb 6 - 8, 2019, Honolulu, HI *Education. Inspiration. Illumination.*  
[State-of-the-Science Stroke Nursing Symposium](#) and [ISC Pre-Conference Symposia](#): Feb 5, 2019, Honolulu, HI

On Sun, Jan 20, 2019 at 6:44 AM Schlunk, Frieder <[frieder.schlunk@charite.de](mailto:frieder.schlunk@charite.de)> wrote:

Dear Pamela,

that's correct. His name is Roy Ornath.

Thanks, Frieder

---

**Von:** Stroke Editorial Office [[stroke@strokeahajournal.org](mailto:stroke@strokeahajournal.org)]

**Gesendet:** Freitag, 18. Januar 2019 15:15

**An:** Schlunk, Frieder; Ayata, Cenk, M.D.

**Betreff:** Re: [ext] Re: STROKE/2018/021732R1 (Secondary bleeding during acute experimental intracerebral h...)

Dear Dr. Schlunk,  
Thank you for sending the email address. Could you please confirm the complete name and that he will be the designee.

Best,  
Pamela

**Stroke** Editorial Office  
[stroke@strokeahajournal.org](mailto:stroke@strokeahajournal.org)

**The International Stroke Conference - Connecting the World to Stroke Science!**

[International Stroke Conference](#): Feb 6 - 8, 2019, Honolulu, HI *Education. Inspiration. Illumination.*  
[State-of-the-Science Stroke Nursing Symposium](#) and [ISC Pre-Conference Symposia](#): Feb 5, 2019, Honolulu, HI

On Thu, Jan 17, 2019 at 4:38 PM Schlunk, Frieder <[frieder.schlunk@charite.de](mailto:frieder.schlunk@charite.de)> wrote:

Dear Pamela Lepkowski,

thank you very much! Our co-authors husbands email address is [roy\\_ornath@yahoo.com](mailto:roy_ornath@yahoo.com). He is expecting you to email him.

Best, Frieder

**Von:** Stroke Editorial Office [[stroke@strokeahajournal.org](mailto:stroke@strokeahajournal.org)]

**Gesendet:** Donnerstag, 17. Januar 2019 17:49

**An:** Schlunk, Frieder; Ayata, Cenk, M.D.

**Betreff:** Re: [ext] Re: STROKE/2018/021732R1 (Secondary bleeding during acute experimental intracerebral h...)

Dear Dr. Schlunk,

Please provide the name and email address for the the deceased author's designee. Once we have that information, we can update our files and send the email requests for the electronic forms to the designee through the system. We only can accept forms completed online.

Thank you,  
Pamela

**Stroke** Editorial Office  
[stroke@strokeahajournal.org](mailto:stroke@strokeahajournal.org)

**The International Stroke Conference - Connecting the World to Stroke Science!**

[International Stroke Conference](#): Feb 6 - 8, 2019, Honolulu, HI *Education. Inspiration. Illumination.*  
[State-of-the-Science Stroke Nursing Symposium](#) and [ISC Pre-Conference Symposia](#): Feb 5, 2019, Honolulu, HI

On Thu, Jan 17, 2019 at 10:58 AM Schlunk, Frieder <[frieder.schlunk@charite.de](mailto:frieder.schlunk@charite.de)> wrote:

Dear Pamela Lepkowski,

we recieved the decision letter from STROKE and will provide you with the necessary forms as soon as possible. Do you have a link or a pdf file for the forms (Authorship Responsibility and Copyright Transfer Agreement) in order to

send it to the husband of our co-author?

Thanks again for your help!

Frieder Schlunk

**Stroke Editorial Office** <stroke@strokeahajournal.org>

Thu, Feb 7, 2019 at 10:13 AM

To: Rebecca Seastrong <Rebecca.Seastrong@heart.org>, Erinn Cain <Erinn.Cain@heart.org>

Hello Rebecca and Erinn,

I just checked and the forms are completed (with today's date). HOWEVER, I must have done something wrong as they are both signed by Dr Arbel and not the husband Roy Ornath. Can we go forward with the submission? UGH. pamela

**Stroke** Editorial Office

[stroke@strokeahajournal.org](mailto:stroke@strokeahajournal.org)

**The International Stroke Conference - Connecting the World to Stroke Science!**

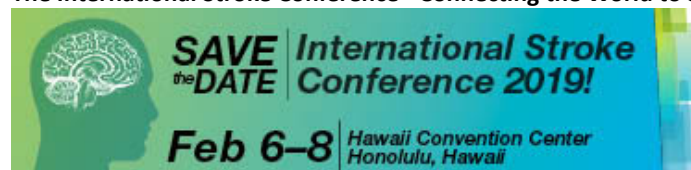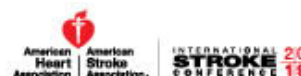

**Housing & Registration Opens:**

**FAHA/VIP: Sept 26, 2018**

**Nonmembers: Oct 10, 2018**

**Members: Oct 3, 2018**

**International Stroke Conference:** Feb 6 - 8, 2019, Honolulu, HI *Education. Inspiration. Illumination.*

**State-of-the-Science Stroke Nursing Symposium and ISC Pre-Conference Symposia:** Feb 5, 2019, Honolulu, HI

----- Forwarded message -----

From: **Schlunk, Frieder** <[frieder.schlunk@charite.de](mailto:frieder.schlunk@charite.de)>

Date: Thu, Feb 7, 2019 at 10:04 AM

Subject: AW: [ext] Re: STROKE/2018/021732R1 (Secondary bleeding during acute experimental intracerebral h...)

To: Stroke Editorial Office <[stroke@strokeahajournal.org](mailto:stroke@strokeahajournal.org)>

Dear Pamela,

Roy Ornath just emailed me that he has completed the forms. Can you confirm that you received it?

Thanks so much!

Frieder

**Von:** Stroke Editorial Office [[stroke@strokeahajournal.org](mailto:stroke@strokeahajournal.org)]

**Gesendet:** Donnerstag, 31. Januar 2019 15:33

**An:** Schlunk, Frieder; Ayata, Cenk, M.D.

**Betreff:** Re: [ext] Re: STROKE/2018/021732R1 (Secondary bleeding during acute experimental intracerebral h...)

Dear Dr. Schlunk,

Unfortunately not. I sent the forms on 1/22 and just resent both forms today. They were sent to [roy\\_ornath@yahoo.com](mailto:roy_ornath@yahoo.com)

Thank you,  
Pamela

**Stroke** Editorial Office  
[stroke@strokeahajournal.org](mailto:stroke@strokeahajournal.org)

**The International Stroke Conference - Connecting the World to Stroke Science!**

[International Stroke Conference](#): Feb 6 - 8, 2019, Honolulu, HI *Education. Inspiration. Illumination.*  
[State-of-the-Science Stroke Nursing Symposium](#) and [ISC Pre-Conference Symposia](#): Feb 5, 2019, Honolulu, HI

On Thu, Jan 31, 2019 at 6:18 AM Schlunk, Frieder <[frieder.schlunk@charite.de](mailto:frieder.schlunk@charite.de)> wrote:

Dear Pamela,

did you receive the forms for Michal Arbel?

Thanks very much! Frieder

---

**Von:** Stroke Editorial Office [[stroke@strokeahajournal.org](mailto:stroke@strokeahajournal.org)]

**Gesendet:** Dienstag, 22. Januar 2019 15:43

**An:** Schlunk, Frieder

**Betreff:** Re: [ext] Re: STROKE/2018/021732R1 (Secondary bleeding during acute experimental intracerebral h...)

Dear Dr. Schlunk,  
Thank you for confirming. I've just sent the 2 emails with links to the forms to Mr. Ornath.

Thanks again,  
Pamela

**Stroke** Editorial Office  
[stroke@strokeahajournal.org](mailto:stroke@strokeahajournal.org)

**The International Stroke Conference - Connecting the World to Stroke Science!**

[International Stroke Conference](#): Feb 6 - 8, 2019, Honolulu, HI *Education. Inspiration. Illumination.*  
[State-of-the-Science Stroke Nursing Symposium](#) and [ISC Pre-Conference Symposia](#): Feb 5, 2019, Honolulu, HI

On Sun, Jan 20, 2019 at 6:44 AM Schlunk, Frieder <[frieder.schlunk@charite.de](mailto:frieder.schlunk@charite.de)> wrote:

Dear Pamela,

that's correct. His name is Roy Ornath.

Thanks, Frieder

---

**Von:** Stroke Editorial Office [[stroke@strokeahajournal.org](mailto:stroke@strokeahajournal.org)]

**Gesendet:** Freitag, 18. Januar 2019 15:15

**An:** Schlunk, Frieder; Ayata, Cenk, M.D.

**Betreff:** Re: [ext] Re: STROKE/2018/021732R1 (Secondary bleeding during acute experimental intracerebral h...)

Dear Dr. Schlunk,

Thank you for sending the email address. Could you please confirm the complete name and that he will be the designee.

Best,  
Pamela

**Stroke** Editorial Office  
[stroke@strokeahajournal.org](mailto:stroke@strokeahajournal.org)

**The International Stroke Conference - Connecting the World to Stroke Science!**

[International Stroke Conference](#): Feb 6 - 8, 2019, Honolulu, HI *Education. Inspiration. Illumination.*  
[State-of-the-Science Stroke Nursing Symposium](#) and [ISC Pre-Conference Symposia](#): Feb 5, 2019, Honolulu, HI

On Thu, Jan 17, 2019 at 4:38 PM Schlunk, Frieder <[frieder.schlunk@charite.de](mailto:frieder.schlunk@charite.de)> wrote:

Dear Pamela Lepkowski,

thank you very much! Our co-authors husbands email address is [roy\\_ornath@yahoo.com](mailto:roy_ornath@yahoo.com). He is expecting you to email him.

Best, Frieder

**Von:** Stroke Editorial Office [[stroke@strokeahajournal.org](mailto:stroke@strokeahajournal.org)]

**Gesendet:** Donnerstag, 17. Januar 2019 17:49

**An:** Schlunk, Frieder; Ayata, Cenk, M.D.

**Betreff:** Re: [ext] Re: STROKE/2018/021732R1 (Secondary bleeding during acute experimental intracerebral h...)

Dear Dr. Schlunk,

Please provide the name and email address for the the deceased author's designee. Once we have that information, we can update our files and send the email requests for the electronic forms to the designee through the system. We only can accept forms completed online.

Thank you,  
Pamela

**Stroke** Editorial Office  
[stroke@strokeahajournal.org](mailto:stroke@strokeahajournal.org)

**The International Stroke Conference - Connecting the World to Stroke Science!**

[International Stroke Conference](#): Feb 6 - 8, 2019, Honolulu, HI *Education. Inspiration. Illumination.*  
[State-of-the-Science Stroke Nursing Symposium](#) and [ISC Pre-Conference Symposia](#): Feb 5, 2019, Honolulu, HI

On Thu, Jan 17, 2019 at 10:58 AM Schlunk, Frieder <[frieder.schlunk@charite.de](mailto:frieder.schlunk@charite.de)> wrote:

Dear Pamela Lepkowski,



we recieved the decision letter from STROKE and will provide you with the necessary forms as soon as possible. Do you have a link or a pdf file for the forms (Authorship Responsibility and Copyright Transfer Agreement) in order to send it to the husband of our co-author?

Thanks again for your help!

Frieder Schlunk

Rebecca Seastrong <Rebecca.Seastrong@heart.org>  
To: Stroke Editorial Office <stroke@strokeahajournal.org>, Erinn Cain <Erinn.Cain@heart.org>

Thu, Feb 7, 2019 at 10:30 AM

Hi,

It looks fine. You added the husband's email as a secondary email so it looks as if Arbel signed. Our system uses email to allow access, so Roy could have used his yahoo email or Arbel's email to complete the forms.

Also, since Arbel is the author technically, his name appears on the form.

Thanks,

Rebecca

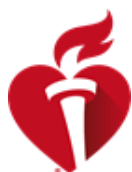

**Rebecca Seastrong**

Managing Editor, *Stroke*

American Heart Association

200 5th Avenue | Waltham | MA | 02451

○ 781.902.4395

The International Stroke Conference - Connecting the World to Stroke Science!

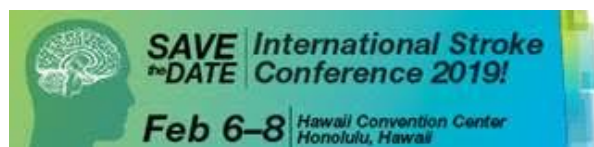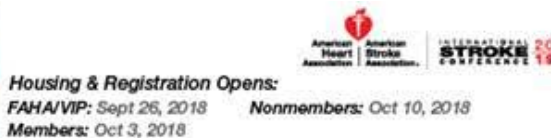

International Stroke Conference: Feb 6 - 8, 2019, Honolulu, HI Education. Inspiration. Illumination.  
State-of-the-Science Stroke Nursing Symposium and ISC Pre-Conference Symposia: Feb 5, 2019, Honolulu, HI

**From:** Stroke Editorial Office <[stroke@strokeahajournal.org](mailto:stroke@strokeahajournal.org)>  
**Sent:** Thursday, February 07, 2019 10:14 AM  
**To:** Rebecca Seastrong <[Rebecca.Seastrong@heart.org](mailto:Rebecca.Seastrong@heart.org)>; Erinn Cain <[Erinn.Cain@heart.org](mailto:Erinn.Cain@heart.org)>  
**Subject:** Fwd: [ext] Re: STROKE/2018/021732R1 (Secondary bleeding during acute experimental intracerebral h...)

\*\*\* **CAUTION:** This email originated from outside of the **American Heart Association**. Do **not** click links or open attachments unless you recognize the sender and know the content is safe. \*\*\*

Hello Rebecca and Erinn,

I just checked and the forms are completed (with today's date). HOWEVER, I must have done something wrong as they are both signed by Dr Arbel and not the husband Roy Ornath. Can we go forward with the submission? UGH. pamela

Stroke Editorial Office  
[stroke@strokeahajournal.org](mailto:stroke@strokeahajournal.org)

### The International Stroke Conference - Connecting the World to Stroke Science!

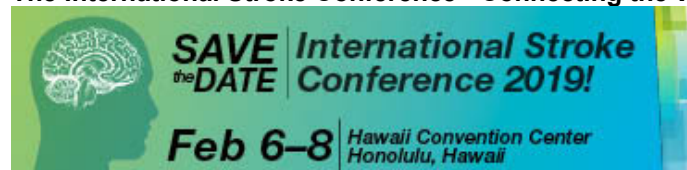

#### Housing & Registration Opens:

FAHA/VIP: Sept 26, 2018

Nonmembers: Oct 10, 2018

Members: Oct 3, 2018

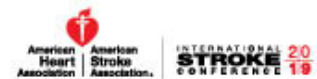

International Stroke Conference: Feb 6 - 8, 2019, Honolulu, HI *Education. Inspiration. Illumination.*  
 State-of-the-Science Stroke Nursing Symposium and ISC Pre-Conference Symposia: Feb 5, 2019, Honolulu, HI

----- Forwarded message -----

**From:** Schlunk, Frieder <[frieder.schlunk@charite.de](mailto:frieder.schlunk@charite.de)>  
**Date:** Thu, Feb 7, 2019 at 10:04 AM  
**Subject:** AW: [ext] Re: STROKE/2018/021732R1 (Secondary bleeding during acute experimental intracerebral h...)  
**To:** Stroke Editorial Office <[stroke@strokeahajournal.org](mailto:stroke@strokeahajournal.org)>

Dear Pamela,

Roy Ornath just emailed me that he has completed the forms. Can you confirm that you received it?

Thanks so much!

Frieder

---

**Von:** Stroke Editorial Office [[stroke@strokeahajournal.org](mailto:stroke@strokeahajournal.org)]  
**Gesendet:** Donnerstag, 31. Januar 2019 15:33  
**An:** Schlunk, Frieder; Ayata, Cenk, M.D.  
**Betreff:** Re: [ext] Re: STROKE/2018/021732R1 (Secondary bleeding during acute experimental intracerebral h...)

Dear Dr. Schlunk,

Unfortunately not. I sent the forms on 1/22 and just resent both forms today. They were sent to [roy\\_ornath@yahoo.com](mailto:roy_ornath@yahoo.com)

Thank you,

Pamela

**Stroke** Editorial Office  
[stroke@strokeahajournal.org](mailto:stroke@strokeahajournal.org)

**The International Stroke Conference - Connecting the World to Stroke Science!**

[International Stroke Conference](#): Feb 6 - 8, 2019, Honolulu, HI *Education. Inspiration. Illumination.*

[State-of-the-Science Stroke Nursing Symposium](#) and [ISC Pre-Conference Symposia](#): Feb 5, 2019, Honolulu, HI

On Thu, Jan 31, 2019 at 6:18 AM Schlunk, Frieder <[frieder.schlunk@charite.de](mailto:frieder.schlunk@charite.de)> wrote:

Dear Pamela,

did you receive the forms for Michal Arbel?

Thanks very much! Frieder

---

**Von:** Stroke Editorial Office [[stroke@strokeahajournal.org](mailto:stroke@strokeahajournal.org)]

**Gesendet:** Dienstag, 22. Januar 2019 15:43

**An:** Schlunk, Frieder

**Betreff:** Re: [ext] Re: STROKE/2018/021732R1 (Secondary bleeding during acute experimental intracerebral h...)

Dear Dr. Schlunk,

Thank you for confirming. I've just sent the 2 emails with links to the forms to Mr. Ornath.

Thanks again,

Pamela

**Stroke** Editorial Office  
[stroke@strokeahajournal.org](mailto:stroke@strokeahajournal.org)

**The International Stroke Conference - Connecting the World to Stroke Science!**

[International Stroke Conference: Feb 6 - 8, 2019, Honolulu, HI](#) *Education. Inspiration. Illumination.*  
[State-of-the-Science Stroke Nursing Symposium and ISC Pre-Conference Symposia: Feb 5, 2019, Honolulu, HI](#)

On Sun, Jan 20, 2019 at 6:44 AM Schlunk, Frieder <[frieder.schlunk@charite.de](mailto:frieder.schlunk@charite.de)> wrote:

Dear Pamela,

that's correct. His name is Roy Ornath.

Thanks, Frieder

---

**Von:** Stroke Editorial Office [[stroke@strokeahajournal.org](mailto:stroke@strokeahajournal.org)]

**Gesendet:** Freitag, 18. Januar 2019 15:15

**An:** Schlunk, Frieder; Ayata, Cenk, M.D.

**Betreff:** Re: [ext] Re: STROKE/2018/021732R1 (Secondary bleeding during acute experimental intracerebral h...)

Dear Dr. Schlunk,

Thank you for sending the email address. Could you please confirm the complete name and that he will be the designee.

Best,

Pamela

**Stroke** Editorial Office  
[stroke@strokeahajournal.org](mailto:stroke@strokeahajournal.org)

**The International Stroke Conference - Connecting the World to Stroke Science!**

[International Stroke Conference: Feb 6 - 8, 2019, Honolulu, HI](#) *Education. Inspiration. Illumination.*

[State-of-the-Science Stroke Nursing Symposium and ISC Pre-Conference Symposia: Feb 5, 2019, Honolulu, HI](#)

On Thu, Jan 17, 2019 at 4:38 PM Schlunk, Frieder <[frieder.schlunk@charite.de](mailto:frieder.schlunk@charite.de)> wrote:

Dear Pamela Lepkowski,

thank you very much! Our co-authors husbands email address is [roy\\_ornath@yahoo.com](mailto:roy_ornath@yahoo.com). He is expecting you to email him.

Best, Frieder

**Von:** Stroke Editorial Office [[stroke@strokeahajournal.org](mailto:stroke@strokeahajournal.org)]

**Gesendet:** Donnerstag, 17. Januar 2019 17:49

**An:** Schlunk, Frieder; Ayata, Cenk, M.D.

**Betreff:** Re: [ext] Re: STROKE/2018/021732R1 (Secondary bleeding during acute experimental intracerebral h...)

Dear Dr. Schlunk,

Please provide the name and email address for the the deceased author's designee. Once we have that information, we can update our files and send the email requests for the electronic forms to the designee through the system. We only can accept forms completed online.

Thank you,

Pamela

**Stroke** Editorial Office  
[stroke@strokeahajournal.org](mailto:stroke@strokeahajournal.org)

**The International Stroke Conference - Connecting the World to Stroke Science!**

[International Stroke Conference](#): Feb 6 - 8, 2019, Honolulu, HI *Education. Inspiration. Illumination.*

[State-of-the-Science Stroke Nursing Symposium](#) and [ISC Pre-Conference Symposia](#): Feb 5, 2019, Honolulu, HI

On Thu, Jan 17, 2019 at 10:58 AM Schlunk, Frieder <[frieder.schlunk@charite.de](mailto:frieder.schlunk@charite.de)> wrote:

Dear Pamela Lepkowski,

we recieved the decision letter from STROKE and will provide you with the necessary forms as soon as possible. Do you have a link or a pdf file for the forms (Authorship Responsibility and Copyright Transfer Agreement) in order to send it to the husband of our co-author?

Thanks again for your help!

Frieder Schlunk

**Stroke Editorial Office** <stroke@strokeahajournal.org>  
To: Rebecca Seastrong <Rebecca.Seastrong@heart.org>  
Cc: Erinn Cain <Erinn.Cain@heart.org>

Thu, Feb 7, 2019 at 10:35 AM

Phew! Thanks Rebecca. I'll let the CA know they can move forward now. I'm sure they will be very happy!

Best,  
Pamela

**Stroke** Editorial Office  
[stroke@strokeahajournal.org](mailto:stroke@strokeahajournal.org)

**The International Stroke Conference - Connecting the World to Stroke Science!**

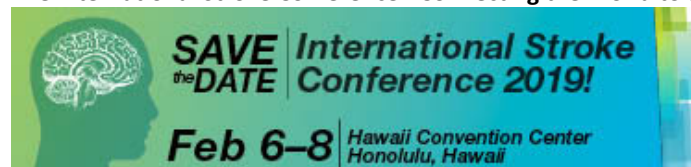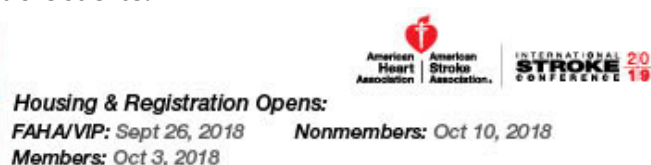

[International Stroke Conference](#): Feb 6 - 8, 2019, Honolulu, HI *Education. Inspiration. Illumination.*  
[State-of-the-Science Stroke Nursing Symposium](#) and [ISC Pre-Conference Symposia](#): Feb 5, 2019, Honolulu, HI

On Thu, Feb 7, 2019 at 10:30 AM Rebecca Seastrong <[Rebecca.Seastrong@heart.org](mailto:Rebecca.Seastrong@heart.org)> wrote:

Hi,

It looks fine. You added the husband's email as a secondary email so it looks as if Arbel signed. Our system uses email to allow access, so Roy could have used his yahoo email or Arbel's email to complete the forms.

Also, since Arbel is the author technically, his name appears on the form.

Thanks,

Rebecca

**Rebecca Seastrong**

Managing Editor, *Stroke*



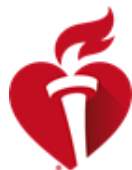

American Heart Association

200 5th Avenue | Waltham | MA | 02451

○ 781.902.4395

The International Stroke Conference - Connecting the World to Stroke Science!

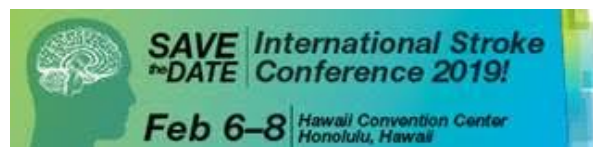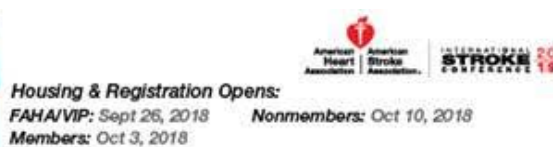

**International Stroke Conference:** Feb 6 - 8, 2019, Honolulu, HI *Education. Inspiration. Illumination.*  
**State-of-the-Science Stroke Nursing Symposium and ISC Pre-Conference Symposia:** Feb 5, 2019, Honolulu, HI

**From:** Stroke Editorial Office <[stroke@strokeahajournal.org](mailto:stroke@strokeahajournal.org)>

**Sent:** Thursday, February 07, 2019 10:14 AM

**To:** Rebecca Seastrong <[Rebecca.Seastrong@heart.org](mailto:Rebecca.Seastrong@heart.org)>; Erinn Cain <[Erinn.Cain@heart.org](mailto:Erinn.Cain@heart.org)>

**Subject:** Fwd: [ext] Re: STROKE/2018/021732R1 (Secondary bleeding during acute experimental intracerebral h...)

\*\*\* **CAUTION:** This email originated from outside of the **American Heart Association**. Do **not** click links or open attachments unless you recognize the sender and know the content is safe. \*\*\*

Hello Rebecca and Erinn,

I just checked and the forms are completed (with today's date). HOWEVER, I must have done something wrong as they are both signed by Dr Arbel and not the husband Roy Ornath. Can we go forward with the submission? UGH. pamel

Stroke Editorial Office  
[stroke@strokeahajournal.org](mailto:stroke@strokeahajournal.org)

The International Stroke Conference - Connecting the World to Stroke Science!

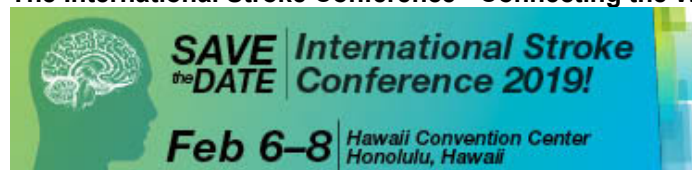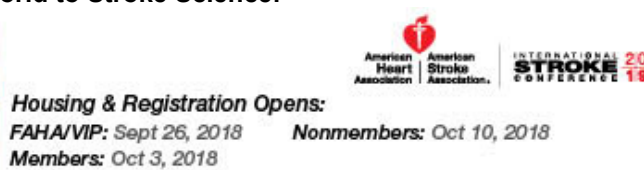

**International Stroke Conference:** Feb 6 - 8, 2019, Honolulu, HI *Education. Inspiration. Illumination.*  
**State-of-the-Science Stroke Nursing Symposium and ISC Pre-Conference Symposia:** Feb 5, 2019, Honolulu, HI

----- Forwarded message -----

From: Schlunk, Frieder <[frieder.schlunk@charite.de](mailto:frieder.schlunk@charite.de)>

Date: Thu, Feb 7, 2019 at 10:04 AM

Subject: AW: [ext] Re: STROKE/2018/021732R1 (Secondary bleeding during acute experimental intracerebral h...)

To: Stroke Editorial Office <[stroke@strokeahajournal.org](mailto:stroke@strokeahajournal.org)>

Dear Pamela,

Roy Ornath just emailed me that he has completed the forms. Can you confirm that you received it?

Thanks so much!

Frieder

---

**Von:** Stroke Editorial Office [[stroke@strokeahajournal.org](mailto:stroke@strokeahajournal.org)]

**Gesendet:** Donnerstag, 31. Januar 2019 15:33

**An:** Schlunk, Frieder; Ayata, Cenk, M.D.

**Betreff:** Re: [ext] Re: STROKE/2018/021732R1 (Secondary bleeding during acute experimental intracerebral h...)

Dear Dr. Schlunk,

Unfortunately not. I sent the forms on 1/22 and just resent both forms today. They were sent to [roy\\_ornath@yahoo.com](mailto:roy_ornath@yahoo.com)

Thank you,

Pamela

**Stroke** Editorial Office

[stroke@strokeahajournal.org](mailto:stroke@strokeahajournal.org)

**The International Stroke Conference - Connecting the World to Stroke Science!**

[International Stroke Conference](#): Feb 6 - 8, 2019, Honolulu, HI *Education. Inspiration. Illumination.*

[State-of-the-Science Stroke Nursing Symposium and ISC Pre-Conference Symposia](#): Feb 5, 2019, Honolulu, HI

On Thu, Jan 31, 2019 at 6:18 AM Schlunk, Frieder <[frieder.schlunk@charite.de](mailto:frieder.schlunk@charite.de)> wrote:

Dear Pamela,

did you receive the forms for Michal Arbel?

Thanks very much! Frieder

---

**Von:** Stroke Editorial Office [[stroke@strokeahajournal.org](mailto:stroke@strokeahajournal.org)]  
**Gesendet:** Dienstag, 22. Januar 2019 15:43  
**An:** Schlunk, Frieder  
**Betreff:** Re: [ext] Re: STROKE/2018/021732R1 (Secondary bleeding during acute experimental intracerebral h...)

Dear Dr. Schlunk,

Thank you for confirming. I've just sent the 2 emails with links to the forms to Mr. Ornath.

Thanks again,

Pamela

**Stroke** Editorial Office  
[stroke@strokeahajournal.org](mailto:stroke@strokeahajournal.org)

**The International Stroke Conference - Connecting the World to Stroke Science!**  
[International Stroke Conference](#): Feb 6 - 8, 2019, Honolulu, HI *Education. Inspiration. Illumination.*  
[State-of-the-Science Stroke Nursing Symposium](#) and [ISC Pre-Conference Symposia](#): Feb 5, 2019, Honolulu, HI

On Sun, Jan 20, 2019 at 6:44 AM Schlunk, Frieder <[frieder.schlunk@charite.de](mailto:frieder.schlunk@charite.de)> wrote:

Dear Pamela,

that's correct. His name is Roy Ornath.

Thanks, Frieder

---

**Von:** Stroke Editorial Office [[stroke@strokeahajournal.org](mailto:stroke@strokeahajournal.org)]  
**Gesendet:** Freitag, 18. Januar 2019 15:15  
**An:** Schlunk, Frieder; Ayata, Cenk, M.D.  
**Betreff:** Re: [ext] Re: STROKE/2018/021732R1 (Secondary bleeding during acute experimental intracerebral h...)

Dear Dr. Schlunk,

Thank you for sending the email address. Could you please confirm the complete name and that he will be the designee.

Best,

Pamela

**Stroke** Editorial Office  
[stroke@strokeahajournal.org](mailto:stroke@strokeahajournal.org)

**The International Stroke Conference - Connecting the World to Stroke Science!**

[International Stroke Conference](#): Feb 6 - 8, 2019, Honolulu, HI *Education. Inspiration. Illumination.*  
[State-of-the-Science Stroke Nursing Symposium and ISC Pre-Conference Symposia](#): Feb 5, 2019, Honolulu, HI

On Thu, Jan 17, 2019 at 4:38 PM Schlunk, Frieder <[frieder.schlunk@charite.de](mailto:frieder.schlunk@charite.de)> wrote:

Dear Pamela Lepkowski,

thank you very much! Our co-authors husbands email address is [roy\\_ornath@yahoo.com](mailto:roy_ornath@yahoo.com). He is expecting you to email him.

Best, Frieder

**Von:** Stroke Editorial Office [[stroke@strokeahajournal.org](mailto:stroke@strokeahajournal.org)]

**Gesendet:** Donnerstag, 17. Januar 2019 17:49

**An:** Schlunk, Frieder; Ayata, Cenk, M.D.

**Betreff:** Re: [ext] Re: STROKE/2018/021732R1 (Secondary bleeding during acute experimental intracerebral h...)

Dear Dr. Schlunk,

Please provide the name and email address for the the deceased author's designee. Once we have that information, we can update our files and send the email requests for the electronic forms to the designee through the system. We only can accept forms completed online.

Thank you,

Pamela

**Stroke** Editorial Office  
[stroke@strokeahajournal.org](mailto:stroke@strokeahajournal.org)

## The International Stroke Conference - Connecting the World to Stroke Science!

International Stroke Conference: Feb 6 - 8, 2019, Honolulu, HI *Education. Inspiration. Illumination.*  
 State-of-the-Science Stroke Nursing Symposium and ISC Pre-Conference Symposia: Feb 5, 2019, Honolulu, HI

On Thu, Jan 17, 2019 at 10:58 AM Schlunk, Frieder <[frieder.schlunk@charite.de](mailto:frieder.schlunk@charite.de)> wrote:

Dear Pamela Lepkowski,

we recieved the decision letter from STROKE and will provide you with the necessary forms as soon as possible. Do you have a link or a pdf file for the forms (Authorship Responsibility and Copyright Transfer Agreement) in order to send it to the husband of our co-author?

Thanks again for your help!

Frieder Schlunk

**Stroke Editorial Office** <[stroke@strokeahajournal.org](mailto:stroke@strokeahajournal.org)>

Thu, Feb 7, 2019 at 10:37 AM

To: "Schlunk, Frieder" <[frieder.schlunk@charite.de](mailto:frieder.schlunk@charite.de)>

Dear Dr. Schlunk,

Great news! The forms were submitted today! If everything else is complete, go ahead and submit your latest revisions.

Thanks for your work and patience during this unusual process.

Best,  
 Pamela

**Stroke** Editorial Office  
[stroke@strokeahajournal.org](mailto:stroke@strokeahajournal.org)

## The International Stroke Conference - Connecting the World to Stroke Science!

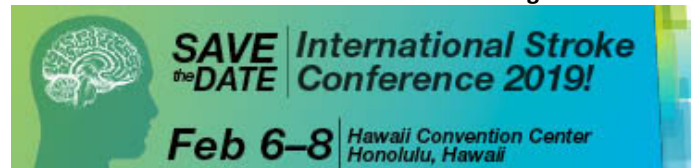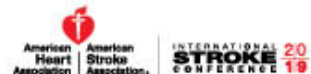

**Housing & Registration Opens:**

**FAHA/VIP:** Sept 26, 2018

**Nonmembers:** Oct 10, 2018

**Members:** Oct 3, 2018

International Stroke Conference: Feb 6 - 8, 2019, Honolulu, HI *Education. Inspiration. Illumination.*

State-of-the-Science Stroke Nursing Symposium and ISC Pre-Conference Symposia: Feb 5, 2019, Honolulu, HI

On Thu, Feb 7, 2019 at 10:04 AM Schlunk, Frieder <[frieder.schlunk@charite.de](mailto:frieder.schlunk@charite.de)> wrote:

Dear Pamela,

Roy Ornath just emailed me that he has completed the forms. Can you confirm that you received it?

Thanks so much!

Frieder

---

**Von:** Stroke Editorial Office [[stroke@strokeahajournal.org](mailto:stroke@strokeahajournal.org)]

**Gesendet:** Donnerstag, 31. Januar 2019 15:33

**An:** Schlunk, Frieder; Ayata, Cenk, M.D.

**Betreff:** Re: [ext] Re: STROKE/2018/021732R1 (Secondary bleeding during acute experimental intracerebral h...)

Dear Dr. Schlunk,

Unfortunately not. I sent the forms on 1/22 and just resent both forms today. They were sent to [roy\\_ornath@yahoo.com](mailto:roy_ornath@yahoo.com)

Thank you,  
Pamela

**Stroke** Editorial Office  
[stroke@strokeahajournal.org](mailto:stroke@strokeahajournal.org)

**The International Stroke Conference - Connecting the World to Stroke Science!**

[International Stroke Conference](#): Feb 6 - 8, 2019, Honolulu, HI *Education. Inspiration. Illumination.*

[State-of-the-Science Stroke Nursing Symposium](#) and [ISC Pre-Conference Symposia](#): Feb 5, 2019, Honolulu, HI

On Thu, Jan 31, 2019 at 6:18 AM Schlunk, Frieder <[frieder.schlunk@charite.de](mailto:frieder.schlunk@charite.de)> wrote:

Dear Pamela,

did you receive the forms for Michal Arbel?

Thanks very much! Frieder

---

**Von:** Stroke Editorial Office [[stroke@strokeahajournal.org](mailto:stroke@strokeahajournal.org)]

**Gesendet:** Dienstag, 22. Januar 2019 15:43

**An:** Schlunk, Frieder

**Betreff:** Re: [ext] Re: STROKE/2018/021732R1 (Secondary bleeding during acute experimental intracerebral h...)

Dear Dr. Schlunk,

Thank you for confirming. I've just sent the 2 emails with links to the forms to Mr. Ornath.

Thanks again,  
Pamela

**Stroke** Editorial Office  
[stroke@strokeahajournal.org](mailto:stroke@strokeahajournal.org)

**The International Stroke Conference - Connecting the World to Stroke Science!**

[International Stroke Conference](#): Feb 6 - 8, 2019, Honolulu, HI *Education. Inspiration. Illumination.*

[State-of-the-Science Stroke Nursing Symposium](#) and [ISC Pre-Conference Symposia](#): Feb 5, 2019, Honolulu, HI



On Sun, Jan 20, 2019 at 6:44 AM Schlunk, Frieder <[frieder.schlunk@charite.de](mailto:frieder.schlunk@charite.de)> wrote:

Dear Pamela,

that's correct. His name is Roy Ornath.

Thanks, Frieder

---

**Von:** Stroke Editorial Office [[stroke@strokeahajournal.org](mailto:stroke@strokeahajournal.org)]

**Gesendet:** Freitag, 18. Januar 2019 15:15

**An:** Schlunk, Frieder; Ayata, Cenk, M.D.

**Betreff:** Re: [ext] Re: STROKE/2018/021732R1 (Secondary bleeding during acute experimental intracerebral h...)

Dear Dr. Schlunk,

Thank you for sending the email address. Could you please confirm the complete name and that he will be the designee.

Best,  
Pamela

**Stroke** Editorial Office  
[stroke@strokeahajournal.org](mailto:stroke@strokeahajournal.org)

**The International Stroke Conference - Connecting the World to Stroke Science!**

[International Stroke Conference](#): Feb 6 - 8, 2019, Honolulu, HI *Education. Inspiration. Illumination.*

[State-of-the-Science Stroke Nursing Symposium](#) and [ISC Pre-Conference Symposia](#): Feb 5, 2019, Honolulu, HI

On Thu, Jan 17, 2019 at 4:38 PM Schlunk, Frieder <[frieder.schlunk@charite.de](mailto:frieder.schlunk@charite.de)> wrote:

Dear Pamela Lepkowski,

thank you very much! Our co-authors husbands email address is [roy\\_ornath@yahoo.com](mailto:roy_ornath@yahoo.com). He is expecting you to email him.

Best, Frieder

**Von:** Stroke Editorial Office [[stroke@strokeahajournal.org](mailto:stroke@strokeahajournal.org)]

**Gesendet:** Donnerstag, 17. Januar 2019 17:49

**An:** Schlunk, Frieder; Ayata, Cenk, M.D.

**Betreff:** Re: [ext] Re: STROKE/2018/021732R1 (Secondary bleeding during acute experimental intracerebral h...)

Dear Dr. Schlunk,

Please provide the name and email address for the the deceased author's designee. Once we have that information, we can update our files and send the email requests for the electronic forms to the designee through the system. We only can accept forms completed online.

Thank you,  
Pamela

**Stroke** Editorial Office  
[stroke@strokeahajournal.org](mailto:stroke@strokeahajournal.org)

**The International Stroke Conference - Connecting the World to Stroke Science!**

**International Stroke Conference:** Feb 6 - 8, 2019, Honolulu, HI *Education. Inspiration. Illumination.*  
**State-of-the-Science Stroke Nursing Symposium and ISC Pre-Conference Symposia:** Feb 5, 2019, Honolulu, HI

On Thu, Jan 17, 2019 at 10:58 AM Schlunk, Frieder <[frieder.schlunk@charite.de](mailto:frieder.schlunk@charite.de)> wrote:

Dear Pamela Lepkowski,

we recieved the decision letter from STROKE and will provide you with the necessary forms as soon as possible. Do you have a link or a pdf file for the forms (Authorship Responsibility and Copyright Transfer Agreement) in order to send it to the husband of our co-author?

Thanks again for your help!

Frieder Schlunk

---

**Schlunk, Frieder** <[frieder.schlunk@charite.de](mailto:frieder.schlunk@charite.de)>  
 To: Stroke Editorial Office <[stroke@strokeahajournal.org](mailto:stroke@strokeahajournal.org)>

Thu, Feb 7, 2019 at 3:42 PM

That is great news!!Thank you very much!

Frieder

---

**Von:** Stroke Editorial Office [[stroke@strokeahajournal.org](mailto:stroke@strokeahajournal.org)]

**Gesendet:** Donnerstag, 7. Februar 2019 16:37

**An:** Schlunk, Frieder

**Betreff:** Re: [ext] Re: STROKE/2018/021732R1 (Secondary bleeding during acute experimental intracerebral h...)

Dear Dr. Schlunk,  
 Great news! The forms were submitted today! If everything else is complete, go ahead and submit your latest revisions.

Thanks for your work and patience during this unusual process.

Best,  
 Pamela

**Stroke** Editorial Office  
[stroke@strokeahajournal.org](mailto:stroke@strokeahajournal.org)

**The International Stroke Conference - Connecting the World to Stroke Science!**

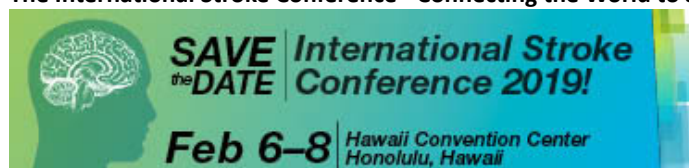

**Housing & Registration Opens:**

**FAHA/VIP:** Sept 26, 2018

**Members:** Oct 3, 2018

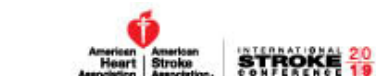

**Nonmembers:** Oct 10, 2018

[International Stroke Conference](#): Feb 6 - 8, 2019, Honolulu, HI *Education. Inspiration. Illumination.*  
[State-of-the-Science Stroke Nursing Symposium](#) and [ISC Pre-Conference Symposia](#): Feb 5, 2019, Honolulu, HI

On Thu, Feb 7, 2019 at 10:04 AM Schlunk, Frieder <[frieder.schlunk@charite.de](mailto:frieder.schlunk@charite.de)> wrote:

Dear Pamela,

Roy Ornath just emailed me that he has completed the forms. Can you confirm that you received it?

Thanks so much!

Frieder

---

**Von:** Stroke Editorial Office [[stroke@strokeahajournal.org](mailto:stroke@strokeahajournal.org)]

**Gesendet:** Donnerstag, 31. Januar 2019 15:33

**An:** Schlunk, Frieder; Ayata, Cenk, M.D.

**Betreff:** Re: [ext] Re: STROKE/2018/021732R1 (Secondary bleeding during acute experimental intracerebral h...)

Dear Dr. Schlunk,

Unfortunately not. I sent the forms on 1/22 and just resent both forms today. They were sent to [roy\\_ornath@yahoo.com](mailto:roy_ornath@yahoo.com)

Thank you,  
Pamela

**Stroke** Editorial Office  
[stroke@strokeahajournal.org](mailto:stroke@strokeahajournal.org)

**The International Stroke Conference - Connecting the World to Stroke Science!**

[International Stroke Conference](#): Feb 6 - 8, 2019, Honolulu, HI *Education. Inspiration. Illumination.*  
[State-of-the-Science Stroke Nursing Symposium](#) and [ISC Pre-Conference Symposia](#): Feb 5, 2019, Honolulu, HI

On Thu, Jan 31, 2019 at 6:18 AM Schlunk, Frieder <[frieder.schlunk@charite.de](mailto:frieder.schlunk@charite.de)> wrote:

Dear Pamela,

did you receive the forms for Michal Arbel?

Thanks very much! Frieder

---

**Von:** Stroke Editorial Office [[stroke@strokeahajournal.org](mailto:stroke@strokeahajournal.org)]

**Gesendet:** Dienstag, 22. Januar 2019 15:43

**An:** Schlunk, Frieder

**Betreff:** Re: [ext] Re: STROKE/2018/021732R1 (Secondary bleeding during acute experimental intracerebral h...)

Dear Dr. Schlunk,  
Thank you for confirming. I've just sent the 2 emails with links to the forms to Mr. Ornath.

Thanks again,  
Pamela

**Stroke** Editorial Office  
[stroke@strokeahajournal.org](mailto:stroke@strokeahajournal.org)

**The International Stroke Conference - Connecting the World to Stroke Science!**

[International Stroke Conference](#): Feb 6 - 8, 2019, Honolulu, HI *Education. Inspiration. Illumination.*  
[State-of-the-Science Stroke Nursing Symposium](#) and [ISC Pre-Conference Symposia](#): Feb 5, 2019, Honolulu, HI

On Sun, Jan 20, 2019 at 6:44 AM Schlunk, Frieder <[frieder.schlunk@charite.de](mailto:frieder.schlunk@charite.de)> wrote:

Dear Pamela,  
  
that's correct. His name is Roy Ornath.  
  
Thanks, Frieder

---

**Von:** Stroke Editorial Office [[stroke@strokeahajournal.org](mailto:stroke@strokeahajournal.org)]  
**Gesendet:** Freitag, 18. Januar 2019 15:15  
**An:** Schlunk, Frieder; Ayata, Cenk, M.D.  
**Betreff:** Re: [ext] Re: STROKE/2018/021732R1 (Secondary bleeding during acute experimental intracerebral h...)

Dear Dr. Schlunk,  
Thank you for sending the email address. Could you please confirm the complete name and that he will be the designee.  
Best,  
Pamela

**Stroke** Editorial Office  
[stroke@strokeahajournal.org](mailto:stroke@strokeahajournal.org)

**The International Stroke Conference - Connecting the World to Stroke Science!**

[International Stroke Conference](#): Feb 6 - 8, 2019, Honolulu, HI *Education. Inspiration. Illumination.*  
[State-of-the-Science Stroke Nursing Symposium](#) and [ISC Pre-Conference Symposia](#): Feb 5, 2019, Honolulu, HI

On Thu, Jan 17, 2019 at 4:38 PM Schlunk, Frieder <[frieder.schlunk@charite.de](mailto:frieder.schlunk@charite.de)> wrote:

Dear Pamela Lepkowski,  
  
thank you very much! Our co-authors husbands email address is [roy\\_ornath@yahoo.com](mailto:roy_ornath@yahoo.com). He is expecting you to email him.  
  
Best, Frieder

**Von:** Stroke Editorial Office [[stroke@strokeahajournal.org](mailto:stroke@strokeahajournal.org)]

**Gesendet:** Donnerstag, 17. Januar 2019 17:49

**An:** Schlunk, Frieder; Ayata, Cenk, M.D.

**Betreff:** Re: [ext] Re: STROKE/2018/021732R1 (Secondary bleeding during acute experimental intracerebral h...)

Dear Dr. Schlunk,

Please provide the name and email address for the the deceased author's designee. Once we have that information, we can update our files and send the email requests for the electronic forms to the designee through the system. We only can accept forms completed online.

Thank you,  
Pamela

**Stroke** Editorial Office  
[stroke@strokeahajournal.org](mailto:stroke@strokeahajournal.org)

**The International Stroke Conference - Connecting the World to Stroke Science!**

[International Stroke Conference](#): Feb 6 - 8, 2019, Honolulu, HI *Education. Inspiration. Illumination.*

[State-of-the-Science Stroke Nursing Symposium](#) and [ISC Pre-Conference Symposia](#): Feb 5, 2019, Honolulu, HI

On Thu, Jan 17, 2019 at 10:58 AM Schlunk, Frieder <[frieder.schlunk@charite.de](mailto:frieder.schlunk@charite.de)> wrote:

Dear Pamela Lepkowski,

we recieved the decision letter from STROKE and will provide you with the necessary forms as soon as possible. Do you have a link or a pdf file for the forms (Authorship Responsibility and Copyright Transfer Agreement) in order to send it to the husband of our co-author?

Thanks again for your help!

Frieder Schlunk
